# Supplementary material for: Implications of the tectonic rotation of the South Qiangtang Massif for the subduction closure of the BangongCo - Nujiang Tethys Ocean – A study of magnetic fabric and zircon U-Pb chronology
Source: Copernicus journal article supplement (doi:10.5194/egusphere-2022-1214), 2023-01-09
Supplement: Supplementary file [file egusphere-2022-1214-RC3-supplement.pdf]

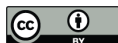

1     **Implications of the tectonic rotation of the South Qiangtang**  
2             **Massif for the subduction closure of the BangongCo -**  
3             **Nujiang Tethys Ocean - A study of magnetic fabric and**  
4                     **zircon U-Pb chronology**

5     Qinglong Chen<sup>1</sup>, Xin Cheng<sup>1</sup>, Feifei Huo<sup>1,b</sup>, Yanan Zhou<sup>1</sup>, Nan Jiang<sup>1,c</sup>, Bitian Wei<sup>1</sup>,  
6     Baofeng Wang<sup>1,d</sup>, Pengxiang Xu<sup>1,d</sup>, Dongmeng Zhang<sup>1</sup>, Longyun Xing<sup>1</sup>, Teng Li<sup>1</sup>,  
7     Feifan Liu<sup>1</sup>, Jingyue Wu<sup>1</sup>, Jiawei Wang<sup>1</sup>, Hanning Wu<sup>1\*</sup>, and the Northwest University  
8     Paleomagnetism Team+

9  
10    <sup>1</sup> State Key Laboratory of Continental Dynamics, Department of Geology, Northwest  
11    University, Xi'an, 710069, China

12    <sup>b</sup>now at: College of Engineering, Zunyi Normal University, Zunyi Guizhou 563006,  
13    China

14    <sup>c</sup>now at: College of Petrol and Environment Engineering, Yan'an University, Yan'an  
15    716000, Shaanxi, China

16    <sup>d</sup>now at: Gansu Provincial Coal Geological Exploration Institute, Lanzhou 730000,  
17    China

18    +A full list of authors appears at the end of the paper.

19  
20    **Correspondence:** Qinglong Chen; chenqinglong@stumail.nwu.edu.cn  
21                     Hanning Wu; wuhn2506@nwu.edu.cn

22  
23    **Abstract:** In the BangongCo-Nujiang Tethys Ocean, the timing of closure and  
24    subduction polarity are key issues in the study of the Tethys domain. Detailed magnetic  
25    fabrics and zircon U-Pb dating of marine carbonates collected in the South Qiangtang  
26    Massif and clastic rocks collected in the Ban-Nu Suture Zone were carried out to  
27    constrain their subduction and collapse processes, from the Middle to Late Jurassic-  
28    Early Cretaceous. The results show that the Shamuluo Formation in the suture zone is  
29    131-95 Ma in age, which belongs to the Late Jurassic-Early Cretaceous and develops a  
30    primitive sedimentary magnetic fabric; Under the tectonic stress, the limestones in the  
31    Middle Jurassic Buqu Formation developed the strongly cleaved magnetic fabric.  
32    Meanwhile, the sandstones in the Late Jurassic Sowa Formation developed the tensile  
33    lineation and initial deformed magnetic fabrics. Integrated magnetic fabrics, zircon U-  
34    Pb chronology and petrographic studies suggest a WE to SW-NE anticlockwise sinistral  
35    movement in the South Qiangtang Massif from the Buqu Formation to the early Suowa  
36    Formation; In the Late Suowa Formation, it began a clockwise dextral movement. The  
37    change in the direction of massif rotation was associated with a change in the  
38    subduction polarity of the BangongCo-Nujiang Tethys Ocean. The BangongCo-  
39    Nujiang Ocean changed from southward subduction to northward subduction, which  
40    began at the Buqu Formation and ended at the late Sowa Formation (163.5-157.3 Ma).



41 Afterwards, it began to close at 145 Ma and ended its subduction after 131-109.9 Ma,  
42 achieving complete closure of the central BangongCo - Nujiang Tethys Ocean.

43

44 **Key words:** BangongCo-Nujiang Tethys Ocean; South Qiangtang Massif; closure time;  
45 subduction polarity; magnetic fabric; zircon U-Pb chronology

## 46 0 Introduction

47 Most rocks contain ferromagnetic minerals, and tectonics causes deformation or  
48 dynamic recrystallisation of them, resulting in their directional alignment, causing the  
49 anisotropy of magnetic susceptibility (Lu et al, 2008). The magnetic record of tectonic  
50 action through mineral deformation is expressed as magnetic fabric. Because of the  
51 good correspondence between rock magnetization ellipsoids and strain ellipsoids  
52 (Kneen, 1976; Rathore, 1979), they are widely used for tectonic deformation,  
53 paleostress recovery (Borradaile and Henry, 1997), and sediment palaeoflow (Gurioli  
54 et al, 2005), etc. Thus, it is possible to analyze the tectonic deformation, as well as the  
55 manner and direction of stress action. In addition, combining zircon U-Pb chronology  
56 with magnetic fabric allows greater constraints on tectonic evolutionary processes.

57 The subduction and closure of the BangongCo-Nujiang Tethys Ocean is an  
58 important tectonic event of the formation and evolution in the Tibetan Plateau (Yin and  
59 Harrison, 2000; Metcalfe, 2013). Existing studies generally agree that the onset of  
60 subduction for the BangongCo-Nujiang Tethys Ocean occurred from the Early-Middle  
61 Jurassic to Early Cretaceous (Yin and Harrison, 2000; Guynn et al, 2006; Kapp et al,  
62 2007; Zhu et al, 2016), but there is considerable disagreement about the exact timing.  
63 To start with, intercalated bioclastic rocks mixed in the OIB basalt (120-108 Ma) of the  
64 Ban-Nu Suture Zone, supports the onset of subduction in the Middle Jurassic (Liu et al,  
65 2014); Furthermore, deep geophysics and mantle dynamics consider that the Ban-Nu  
66 Ocean was subducted under the Qiangtang Massif at 110 Ma (Kapp et al, 2007);  
67 Moreover, zircon chronology of collisional granites explains that the Ban-Nu Ocean  
68 was still subducted at 120-110 Ma (Li et al, 2022). As for the subduction polarity, there  
69 are three views: northward, southward. North-south bi-directional subduction. (1) Early  
70 Jurassic MORB-type (-180 Ma), arc-front ophiolites (Gyunn et al, 2006; Wang et al,  
71 2016) in SSZ-type (190-180 Ma) and high-Mg andesites represent an arc-trench system  
72 of northward subduction in the Tethys Ocean (Whattam and Stern, 2011; Ishizuka et al,  
73 2014); (2) Extensive outcrops of the MugaGangri mélangé correspond to a southward  
74 subduction of the pre-arc basin; (3) The high and low calcium-alkaline content basalts  
75 separated from the volcanic rocks of the North Lhasa Massif suggest plate reversal and  
76 plate breakage (Gvirtzman and Nur, 1999; Grove et al, 2009). Furthermore, the Ban-  
77 Nu Ocean was subducted north-south (116-100 Ma) in both directions in response to  
78 mantle flow circulation.

79 Therefore, it is crucial to clarify the timing of closure and the subduction polarity  
80 of the BangongCo-Nujiang Tethys Ocean. While this paper is proposed to combine  
81 magnetic fabrics analysis with zircon U-Pb dating studies. Petrological, magnetic fabric  
82 and zircon chronological studies were carried out on the Buqu and Suowa Formations



83 of the Middle-Late Jurassic in the South Qiangtang Massif, as well as, the Shamuluo  
84 Formation of the Late Jurassic-Early Cretaceous in the Ban-Nu Suture Zone. The  
85 studies will limit the closure time and constrain their subduction process of the  
86 BangongCo-Nujiang Tethys Ocean, from the Middle-Late Jurassic to Early Cretaceous.

## 87 **1 Geological background**

88 The BangongCo-Nujiang Suture Zone is located in the central Tibetan Plateau,  
89 dividing the Qiangtang Massif to the north and the Lhasa Massif to the south, which  
90 represents the vanishing BangongCo-Nujiang Tethys Ocean (Yin and Harrison, 2000;  
91 Pan et al, 2012). The evolution of the Ban-Nu Suture Zone is complex, including  
92 successive outcrops of Jurassic ophiolite, subduction accretionary detrital rocks and  
93 medium acidic magmatic rocks (Figure 1(a)). The suture zone and the extensively  
94 developed magmatic rocks on both sides record geological information on the  
95 subduction closure, plate breakup and crustal dismantling of the Ban-Nu Ocean (Zhu  
96 et al, 2011,2016; Hu et al, 2017). While to its north, from the Jurassic to Early  
97 Cretaceous period, the South Qiangtang Massif developed a foreland basin under the  
98 effect of ocean-land collision. As for the foreland basin, it appears an uncomfortable  
99 contact with the underlying strata and a sand-mudstone complex marble deposit,  
100 showing an early wedge-shaped sedimentary body of the foreland basin. This gradual  
101 change from Middle Jurassic-Late Cretaceous to marine molasse deposits marks a  
102 transform in the nature of deposition in the South Qiangtang Massif.

103 Under the subduction background, the Shamulo Formation clastic rocks exposed  
104 in the BangongCo-Nujiang Suture Zone are active continental margin deposits with  
105 residual sea basin properties in the Ban-Nu Ocean, from the Middle-Late Jurassic to  
106 Early Cretaceous (Wu et al, 2021). As for its lithological composition comprises a suite  
107 of shallow metamorphic slates, sandstones interbedded with carbonates, andesites and  
108 andesitic crystalline tuffs. Besides, the Shamuluo Formation is in angularly  
109 unconformable contact with the Lower MugaGangri Group.

110 The Buqu and Suowa Formations in the Middle-Late Jurassic belong to the South  
111 Qiangtang Massif, which is a sea-land transitional phase of shallow water-land shelf  
112 deposits, developing carbonates and clastic rocks. The lithological composition of the  
113 Buqu Formation was made up of thickly bedded bioclastic tuffs, micrite interbedded  
114 with bioclastic tuffs and dolomitic micrite, distinguished from the Tuotuohe Formation  
115 by grey-black bioclastic tuffs at the base. The lower section of the Suowa Formation  
116 develops red-grey marl and bioclastic micrite, whose upper section develops muddy  
117 siltstones (Figure 1(b)). The marl and bioclastic tuffs are developed in unequal  
118 thickness interbedded with thinly interbedded mesoscopic tuffs. Meanwhile, the  
119 sandstones develop parallel bedding and ripple marks, and the siltstone contains  
120 sporopollen and dinoflagellate fossils. Besides, the basement of Buqu Formation is in  
121 conformable contact with the Xiali Formation.

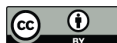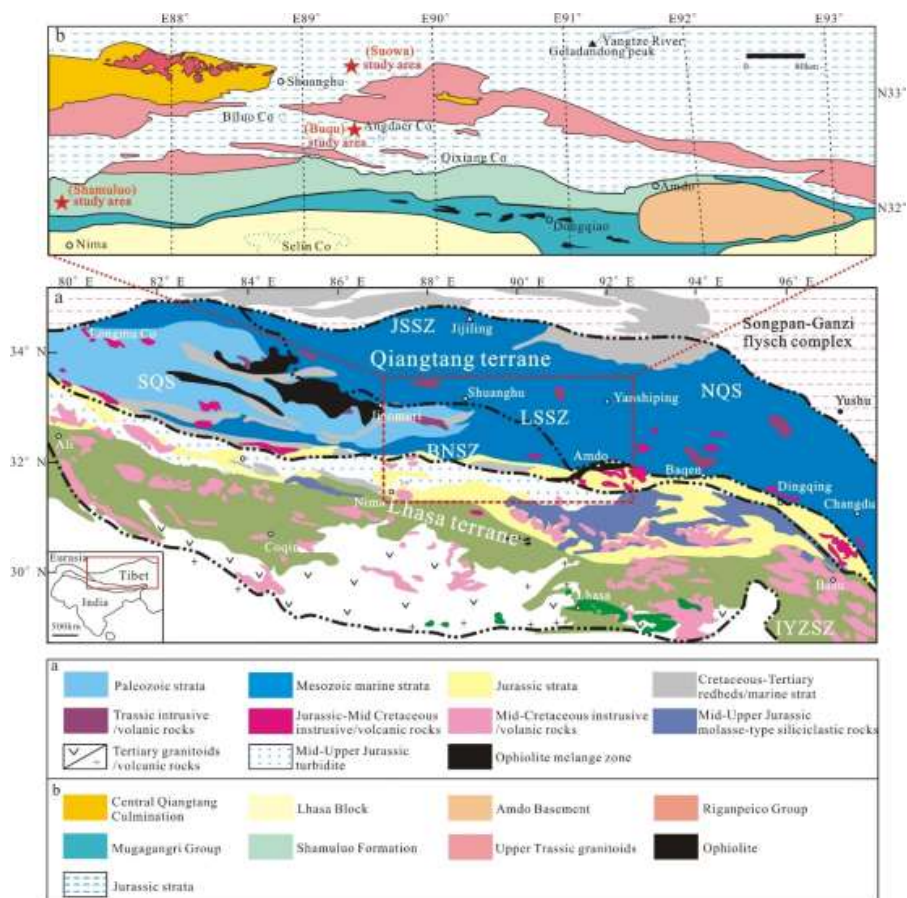

122

123 Figure 1. Sedimentary stratigraphy, lithological distribution and tectonic unit  
 124 delineation in the South Qiangtang Massif and the Ban-Nu Suture Zone. (a) Geological  
 125 map of the Tibetan Plateau; (b) Geological map of the study area.

## 126 2 Sample collection and testing

### 127 2.1 Sample collection

128 Sample collection was carried out in relevant sections in the Nyima area of the  
 129 Lhasa Massif and the Shuangzhu area of the South Qiangtang Massif (Figure 1(b)).  
 130 Samples of the Shamuluo Formation were collected from a continuous section in the  
 131 Ban-Nu Suture Zone at 32°02'02" N, 87°04'07" E. Among them, the lithology is  
 132 mainly siltstone, muddy siltstone (site no. JS01-04) and volcanic clastic (site no. JS05).  
 133 As for the Suowa Formation samples were collected from two sections in the South  
 134 Qiangtang Massif at 33°08'07" N and 89°00'43" E, respectively. Among them, the  
 135 lithology is silty mudstone and muddy siltstone (site no. J3A). In addition, samples  
 136 from the Buqu Formation were collected in three profiles completed at the following



137 locations: 32°44'27" N, 89°22'37" E; 32°42'33" N, 89°22'10" E and 32°39'41" N,  
 138 89°33'19" E. Among them, the lithology is bioclastic tuff and micrite (site no. J2B),  
 139 with 198 pieces collected. Beyond that, 34 sandstones and 36 volcanic clasts samples  
 140 from the Shamuluo Formation and 69 sandstone samples from the Suowa Formation  
 141 were collected. All samples were drilled in the field using a portable petrol drill rig,  
 142 oriented and sampled using an orienteer and magnetic compass, then cut indoors into  
 143 standard cylindrical samples in 2.2cm high, with the remaining samples used for rock  
 144 magnetic analysis and zircon U-Pb dating.

## 145 2.2 Analysis methods

146 Testing and analysis of the magnetic fabric samples was completed at the State  
 147 Key Laboratory of Continental Dynamics, Northwest University. The magnetic fabric  
 148 analysis was carried out using a Kappabridge magnetization meter (MFK1-FB, test  
 149 field strength 300 A/m, detection limit  $2 \times 10^{-8}$  SI, test accuracy 1%) from AGICO,  
 150 Czech Republic, to test the anisotropy of the magnetization at low fields with room  
 151 temperature (298 K, operating frequency 975 HZ), and the results were processed using  
 152 Anisoft 4.2 software, while were shown in Table 1. Rock magnetics experiments  
 153 include variation of magnetization with temperature (K-T) and saturated isothermal  
 154 remanent magnetization (SIRM). For one thing, the magnetization variation with  
 155 temperature experiments were carried out on a MFK1-FA Kappabridge multi-frequency  
 156 magnetization meter, where the sample was heated from room temperature to 700°C,  
 157 then gradually being cooled to room temperature. Throughout the process, the  
 158 magnetization versus temperature curves obtained were used to determine the main  
 159 magnetically loaded minerals in the samples. For another, the isothermal remanent  
 160 magnetization (IRM) test determines the type of magnetic mineral in a sample by the  
 161 variation in the magnetization and demagnetization curves. Later, the addition of the  
 162 field is done using the ASC IM-10-30 pulsed magnetometer and the measurement is  
 163 done using the JR-6A two-speed rotating magnetometer.

164 Zircon U-Pb dating tests were completed at Nanjing Hongchuang Geological  
 165 Exploration Technology Service Co. Zircons with clear ring bands and intact crystal  
 166 structure, without fractures and inclusions, were selected for testing. Data processing  
 167 included selection of samples and blank signals, correction for instrument sensitivity  
 168 drift, elemental content and U-Th-Pb isotope ratios and age calculations. And the  
 169 international standard zircon 91500 and Australian zircon GJ-1 were used as external  
 170 standards for isotopic correction in the U-Pb isotope dating. For U-Th-Pb isotope ratio  
 171 drift related to the analysis time, a linear interpolation was used to correct for the change  
 172 in 91500 (Liu et al, 2010).

173

174 Table 1. Magnetic fabric parameters of samples from the Ban-Nu Suture Zone and the  
 175 South Qiangtang Massif at room temperature (RT).

| Sampling site | N  | Km                   | L     | F     | Pj    | T     | K1         | K2        | K3         |
|---------------|----|----------------------|-------|-------|-------|-------|------------|-----------|------------|
| JS01          | 10 | 130×10 <sup>-6</sup> | 1.001 | 1.003 | 1.006 | 0.316 | 268.1/6.0  | 359.1/8.8 | 144.4/79.3 |
| JS02          | 13 | 144×10 <sup>-6</sup> | 1.002 | 1.004 | 1.006 | 0.276 | 289.5/0.5  | 19.5/0.1  | 123.0/89.5 |
| JS03          | 5  | 142×10 <sup>-6</sup> | 1.001 | 1.003 | 1.004 | 0.274 | 261.7/15.9 | 4.9/38.6  | 153.9/47.1 |



|                       |    |                         |        |       |       |        |            |            |             |
|-----------------------|----|-------------------------|--------|-------|-------|--------|------------|------------|-------------|
| JS04                  | 6  | 119×10 <sup>-6</sup>    | 1.002  | 1.003 | 1.005 | 0.218  | 199.4/4.7  | 290.1/8.0  | 79.4/80.7   |
| <b>Shamuluo</b>       | 34 | 135×10 <sup>-6</sup>    | 1.002  | 1.003 | 1.005 | 0.277  | 265.5/5.2  | 356.0/6.2  | 135.7/81.9  |
| <b>profile (mean)</b> |    |                         |        |       |       |        |            |            |             |
| J3SA01                | 6  | 57.6×10 <sup>-6</sup>   | 1.052  | 1.006 | 1.065 | -0.238 | 98.0/59.3  | 263.4/29.9 | 357.1/6.4   |
| J3SA02                | 7  | 46.2×10 <sup>-6</sup>   | 1.009  | 1.004 | 1.014 | -0.228 | 220.4/77.6 | 101.8/6.0  | 10.7/10.8   |
| J3SA03                | 14 | 82.2×10 <sup>-6</sup>   | 1.011  | 1.003 | 1.016 | -0.520 | 351.5/78.1 | 213.3/8.9  | 122.1/7.8   |
| <b>Suowa profile</b>  | 27 | 67.4×10 <sup>-6</sup>   | 1.020  | 1.004 | 1.026 | -0.386 | 88.9/77.3  | 274.9/12.6 | 184.6/1.3   |
| <b>1(mean)</b>        |    |                         |        |       |       |        |            |            |             |
| J3SA01                | 8  | 35.4×10 <sup>-6</sup>   | 1.004  | 1.006 | 1.010 | 0.239  | 293.9/45.1 | 201.4/2.5  | 109.0/44.8  |
| J3SA02                | 9  | 34.3×10 <sup>-6</sup>   | 1.003  | 1.004 | 1.007 | 0.109  | 204.1/0.1  | 294.1/37.0 | 114.0/53.0  |
| J3SA03                | 7  | 34.3×10 <sup>-6</sup>   | 1.003  | 1.006 | 1.010 | 0.326  | 354.4/15.7 | 254.7/30.8 | 107.7/54.67 |
| J3SA04                | 7  | 31.4×10 <sup>-6</sup>   | 1.004  | 1.006 | 1.010 | 0.166  | 171.7/2.0  | 262.5/20.3 | 76.2/69.611 |
| J3SA05                | 11 | 29.2×10 <sup>-6</sup>   | 1.006  | 1.006 | 1.013 | -0.008 | 338.6/22.6 | 246.6/5.0  | 144.9/66.8  |
| <b>Suowa profile</b>  | 42 | 32.7×10 <sup>-6</sup>   | 1.004  | 1.006 | 1.010 | 0.149  | 341.5/21.9 | 242.5/21.3 | 112.8/58.7  |
| <b>2(mean)</b>        |    |                         |        |       |       |        |            |            |             |
| J2BA01                | 8  | 15.8×10 <sup>-6</sup>   | 1.012  | 1.033 | 1.048 | 0.263  | 331.7/29.5 | 240.0/3.1  | 28.2/18.9   |
| J2BA02                | 8  | 11.1×10 <sup>-6</sup>   | 1.006  | 1.015 | 1.022 | 0.426  | 325.4/5.2  | 235.0/4.2  | 106.2/83.3  |
| J2BA03                | 10 | 21.8×10 <sup>-6</sup>   | 1.014  | 1.031 | 1.048 | 0.223  | 33.6/20.1  | 289.2/34.1 | 148.4/48.9  |
| J2BA04                | 8  | 18.0×10 <sup>-6</sup>   | 1.014  | 1.022 | 1.037 | 0.211  | 26.3/20.2  | 271.5/48.8 | 130.7/34.1  |
| J2BA05                | 6  | 31.4×10 <sup>-6</sup>   | 1.024  | 1.066 | 1.096 | 0.431  | 24.8/29.2  | 283.3/19.6 | 164.4/53.7  |
| J2BA06                | 9  | 15.7×10 <sup>-6</sup>   | 1.012  | 1.020 | 1.034 | 0.183  | 41.2/20.6  | 292.6/40.2 | 151.5/42.6  |
| J2BA07                | 8  | 11.4×10 <sup>-6</sup>   | 1.009  | 1.019 | 1.029 | 0.301  | 235.7/29.7 | 143.3/4.2  | 46.0/60.0   |
| J2BA08                | 8  | 475×10 <sup>-6</sup>    | 1.009  | 1.025 | 1.036 | 0.424  | 14.9/26.2  | 267.2/31.8 | 136.3/46.6  |
| J2BA09                | 8  | 19.1×10 <sup>-6</sup>   | 1.010  | 1.045 | 1.059 | 0.592  | 31.3/5.2   | 297.7/34.6 | 128.8/54.9  |
| <b>Buqu profile</b>   | 74 | 67.2×10 <sup>-6</sup>   | 1.012  | 1.029 | 1.044 | 0.331  | 27.7/18.2  | 286.2/31.3 | 143.2/52.7  |
| <b>1(mean)</b>        |    |                         |        |       |       |        |            |            |             |
| J2BB10                | 19 | 19.3×10 <sup>-6</sup>   | 1.010  | 1.039 | 1.053 | 0.523  | 27.6/26.9  | 294.7/5.8  | 193.6/62.4  |
| J2BB11                | 6  | 12.1×10 <sup>-6</sup>   | 1.020  | 1.060 | 1.085 | 0.470  | 93.3/21.2  | 352.2/26.3 | 217.1/55.1  |
| J2BB12                | 11 | 15.1×10 <sup>-6</sup>   | 1.022  | 1.039 | 1.064 | 0.237  | 70.8/22.1  | 328.1/28.5 | 192.9/52.6  |
| J2BB13                | 10 | 32.1×10 <sup>-6</sup>   | 1.009  | 1.029 | 1.040 | 0.377  | 250.2/74.3 | 29.3/12.0  | 121.5/10.0  |
| J2BB14                | 11 | 47.3×10 <sup>-6</sup>   | 1.018  | 1.075 | 1.101 | 0.596  | 333.4/76.1 | 228.9/3.5  | 138.0/13.4  |
| J2BB15                | 7  | 58.0×10 <sup>-6</sup>   | 1.014  | 1.066 | 1.087 | 0.576  | 334.0/75.9 | 230.5/3.3  | 139.7/13.7  |
| J2BB16                | 13 | 45.9×10 <sup>-6</sup>   | 1.016  | 1.055 | 1.076 | 0.546  | 8.5/69.4   | 227.4/16.3 | 133.8/12.2  |
| J2BB17                | 10 | 52.3×10 <sup>-6</sup>   | 1.011  | 1.031 | 1.045 | 0.437  | 336.2/70.1 | 214.9/10.7 | 121.7/16.6  |
| <b>Buqu profile</b>   | 87 | 34.2×10 <sup>-6</sup>   | 1.014  | 1.048 | 1.066 | 0.474  | 29.8/42.7  | 252.5/38.5 | 142.8/23.0  |
| <b>2(mean)</b>        |    |                         |        |       |       |        |            |            |             |
| J2BC18                | 12 | -4.432×10 <sup>-6</sup> | 1.061  | 1.122 | 1.201 | 0.154  | 72.5/8.3   | 164.2/11.7 | 307.8/75.6  |
| J2BC19                | 11 | -1.69×10 <sup>-6</sup>  | 1.171  | 1.160 | 1.371 | 0.055  | 266.1/5.7  | 175.5/6.0  | 39.4/81.8   |
| J2BC20                | 14 | -1.35×10 <sup>-6</sup>  | -0.531 | 1.757 | 4.237 | 0.105  | 128.9/0.1  | 218.9/8.3  | 38.0/81.7   |
| <b>Buqu profile</b>   | 37 | -2.51×10 <sup>-6</sup>  | 0.414  | 1.076 | 1.282 | 0.099  | 122.4/1.9  | 212.6/5.8  | 13.8/83.9   |
| <b>3(mean)</b>        |    |                         |        |       |       |        |            |            |             |



## 177 3 Test results

### 178 3.1 Petrographic features

#### 179 3.1.1 Shamuluo Formation

180 Microscopic observations of the Shamuluo Formation show (Figure 2) that the  
181 main mineral composition of its sandstones consists of quartz (50-60%), feldspar (5%),  
182 mineral fragments (15-20%) and matrix (15-20%). The majority of the quartz  
183 component is derived from the clastic component and the igneous component, with the  
184 clastic quartz containing gas-liquid inclusions. The quartz of the parent rock is also  
185 irregularly residual, having been denuded during transport. The volcanic quartz is  
186 irregular, with dissolution ports and intragranular microcracks. Mineral fragments  
187 containing white mica with bright interference color in orthogonal polarization.  
188 Tuff clasts containing feldspar and quartz crystals of varying sizes. Chlorite appears pale  
189 green and pale yellow under a single polarizer. The matrix is dominated by carbonate  
190 mortar, locally showing grains of vivid interference color. In addition to quartz, the  
191 volcanic clastic rocks contain ejecta conglomerates, ejecta clasts, tuff clasts and minor  
192 inclusions of white mica and chlorite.

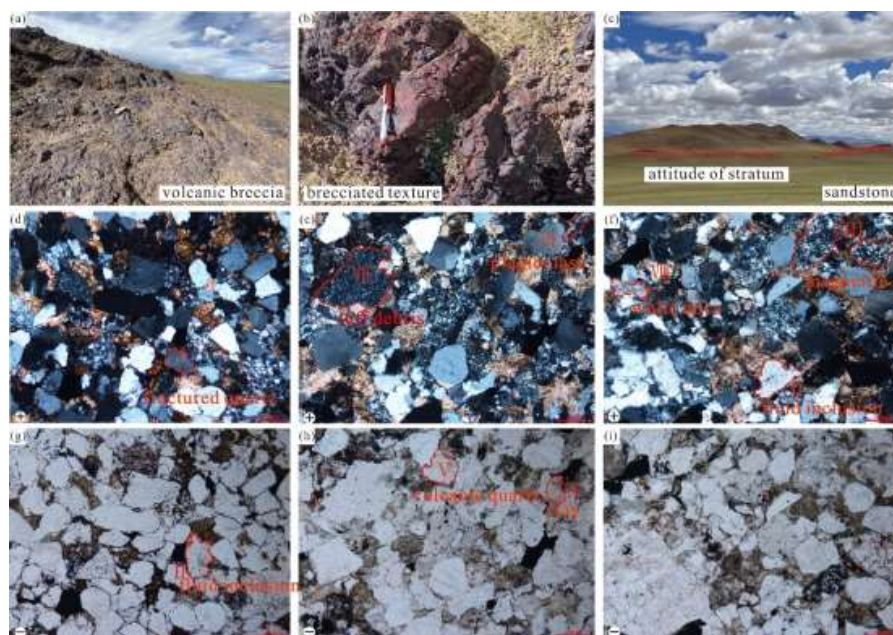

193  
194 Figure 2. Field outcrops and microscopic minerals of the clastic rocks in the Shamuluo  
195 Formation. (a-c) Field outcrops of the Shamuluo Formation; (d-i) Single and orthogonal  
196 polarizing photographs of minerals.

197

#### 198 3.1.2 Suowa Formation

199 Microscopic observations of the Suowa Formation show (Figure 3) that the main



200 mineral composition of the sandstone: quartz (60-70%), feldspar (5%), mineral detritus  
201 (10%) and matrix (15-25%). The quartz is mainly ‘re-rotational’ quartz and volcanic  
202 quartz. “Re-rotational” quartz has no cleavage, but has gas-liquid inclusions and  
203 regrowth. The volcanic quartz is irregularly shaped and has a dissolution edge. The  
204 feldspar type is potassium feldspar, with markedly developed cleavage. The mineral  
205 fragments are dominated by brightly colored interfering white mica, and the matrix is  
206 dominated by ejecta rock fragments, with a small amount of mudstone fragments.  
207 Ejecta rock fragments with a distinct microcrystal orientated arrangement containing  
208 dark minerals such as magnetite. The mudstone fragment is dominated by clay minerals.  
209 The mineral is severely deformed by stress and the crystals indicate visible cracks.

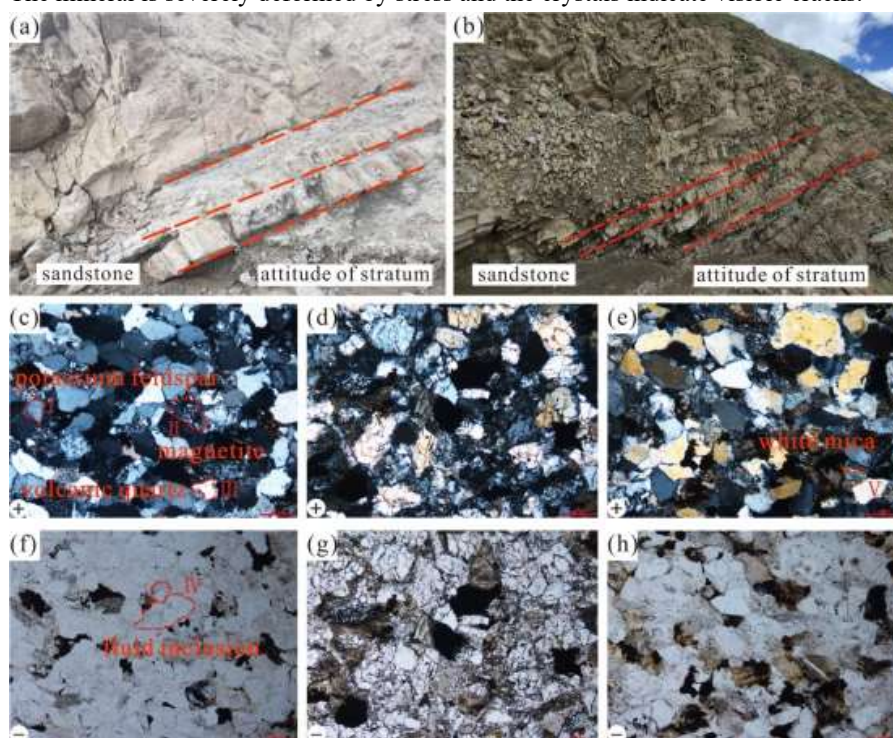

210  
211 Figure 3. Field outcrops and microscopic minerals of the Suowa Formation. (a,b) Field  
212 outcrops of the Suowa Formation; (c-h) Single and orthogonal polarizing photographs  
213 of the minerals.

### 214 3.2 Zircon U-Pb chronology

#### 215 3.2.1 Zircon morphological characteristics

216 The zircon color is mainly off-white and pale yellow, with some light red. The  
217 morphology of the zircon grains appears to be authomorphic or semi-authomorphic,  
218 with some incomplete grains exhibiting an irregular shape, possibly related to  
219 mechanical crushing during transport. The more rounded zircon grains are associated  
220 with long distance transport. The sandstone zircon grains are ellipsoidal and short-  
221 columnar, with the long axis of intact zircon grains at 100  $\mu\text{m}$  and the short axis at





222 around 30-50  $\mu\text{m}$  (Figure 4). Volcanic clastic zircon grains are more columnar in length,  
223 with a maximum long axis of up to 200  $\mu\text{m}$ . Most zircon banding is evident, and the  
224 volcanic clastic banding pattern is more obvious than in the sandstone (Figure 5). A few  
225 shows weak bands or a greyish-bright white color with no apparent structure, associated  
226 with  $\text{Th}^{4+}$  loss due to metamorphic recrystallisation. A few zircons also show a core-  
227 edge structure with oscillating rings in the core and a grey-white acyclic structure in the  
228 edge, reflecting the late growth of zircons of different genesis (Xu et al, 2010).  
229 Sandstone zircon grains have Th/U values between 0.1 and 2.1, mostly greater than 0.4  
230 (Hermann et al, 2001). Their oscillatory rings are distinct and typical of magmatic-  
231 genetic zircons. Volcanic clastic zircon grains with Th/U values greater than 0.5 have  
232 more obvious oscillatory ring and are more influenced by magmatism.

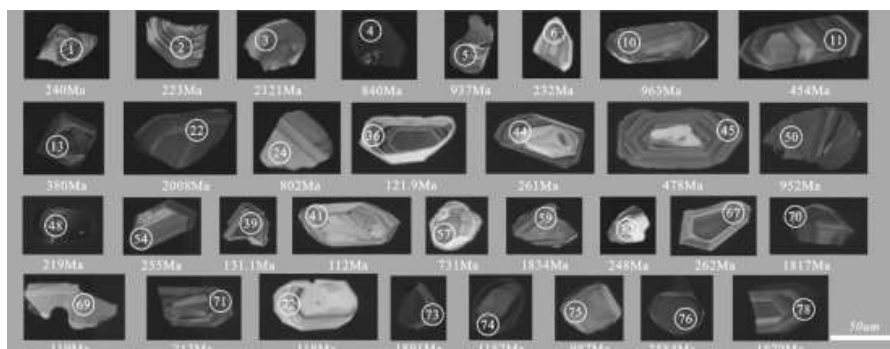

233

234 Figure 4. Representative zircon cathodoluminescence images of the sedimentary clastic  
235 rocks of the Shamuluo Formation (JS01-04).

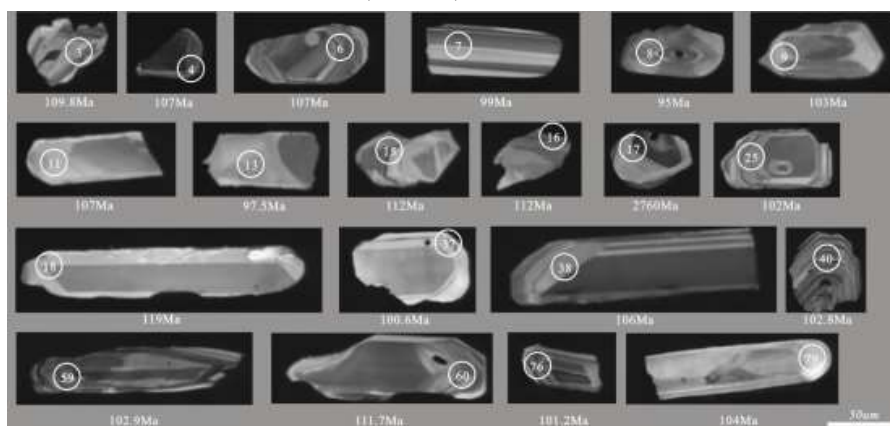

236

237 Figure 5. Representative zircon cathodoluminescence image of the volcanic breccia of  
238 the Shamuluo Formation (JS05).

239

### 240 3.2.2 Zircon age distribution characteristics

241 The youngest and oldest zircon ages obtained for the clastic sandstones are 112  
242 Ma and 2584 Ma, respectively, and the youngest and oldest zircon ages obtained for the  
243 volcanic clastic rocks are 95 Ma and 2760 Ma, respectively. There are seven peaks in

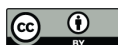

244 clastic sandstone zircons (Figure 6(a)(b)), concentrated at 112-131 Ma, 213-380 Ma,  
 245 415-480 Ma, 627-840 Ma, 902-987 Ma, 1816-1923 Ma and 2417-2584 Ma. Volcanic  
 246 clastic zircons have only one peak, concentrated at 95-116 Ma, with a weighted average  
 247 age of 102.9 Ma (Figure 6(c)(d)). The histogram of the U-Pb isotopic age distribution  
 248 of the zircon shows that the number of zircon grains with relatively recent ages is high  
 249 in the sample. The detrital sandstone zircon grains are most abundant at 100-500 Ma,  
 250 followed by 600-1000 Ma, and least abundant at 1800-2000 Ma and 2500 Ma. The  
 251 volcanic clastic zircon grains are essentially all distributed at 90-120 Ma.

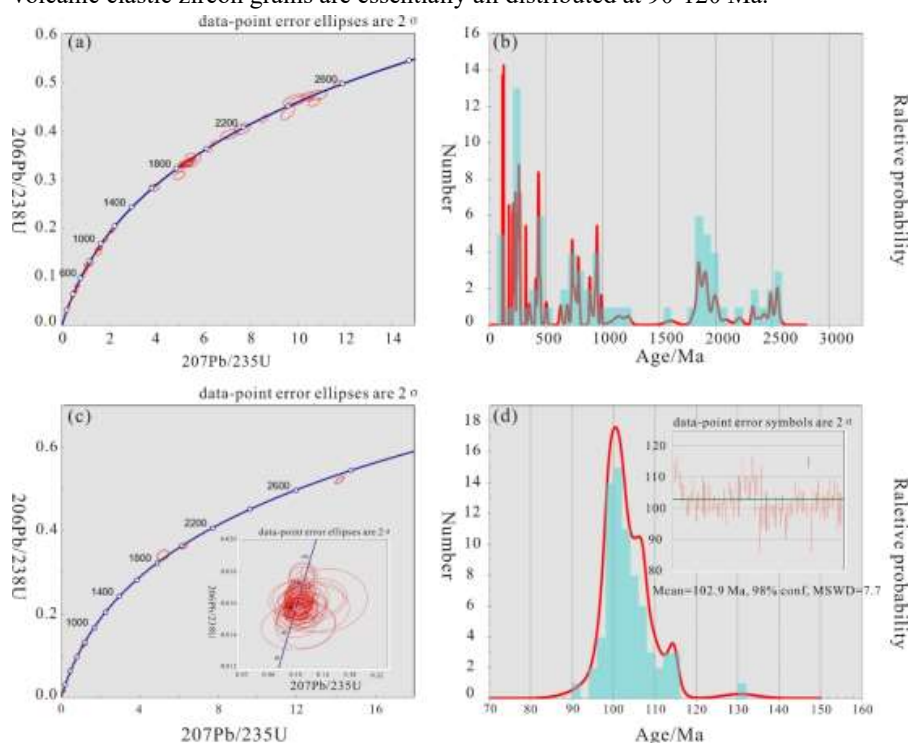

252  
 253 Figure 6. Zircon U-Pb dating concordant and weighted average ages of sedimentary  
 254 clasts (JS01-04) and volcanic clasts (JS05) of the Shamuluo Formation. (a,b) Age  
 255 concordant and distribution histograms for sedimentary clastic rocks; (c,d) Age  
 256 concordance diagram and weighted mean age of volcanic clastic.

257

### 258 3.3 Rock magnetism

#### 259 3.3.1 Variation curve of magnetization with temperature (K-T)

260 Different magnetic minerals exhibit different characteristics during heating and  
 261 cooling, and their characteristics can be used to identify the type and size of magnetic  
 262 minerals (Hroudá, 1994). K-T curves can effectively characterize the changes in  
 263 magnetic minerals and their particle size during heating (Ao and Deng, 2007). The  
 264 experimental results showed that the magnetization values of all samples showed a  
 265 decreasing trend with increasing temperature, indicating the presence of paramagnetic



266 minerals in all samples. A significant increase in magnetization around 400°C and the  
 267 appearance of peak magnetization indicates a phase change in the magnetic minerals,  
 268 possibly resulting from the transformation of some of the magnetic sulfide into  
 269 magnetic pyrite (Fe<sub>3</sub>S<sub>4</sub>). Some samples showed a significant decrease in magnetization  
 270 values around 540°C, associated with the thermal decomposition of magnetic pyrite  
 271 (Fe<sub>3</sub>S<sub>4</sub>). There were also samples where the magnetization values dropped around  
 272 580°C, indicating the presence of magnetite in the sample. The cooling curves for all  
 273 samples showed a significant increase around 580°C, indicating that magnetite was  
 274 produced during cooling (Figure 7). The experiments showed that the magnetic  
 275 minerals in the samples were dominated by magnetite and paramagnetic minerals, while  
 276 the heating and cooling process produced higher amounts of magnetite compared to the  
 277 pre-experimental period.

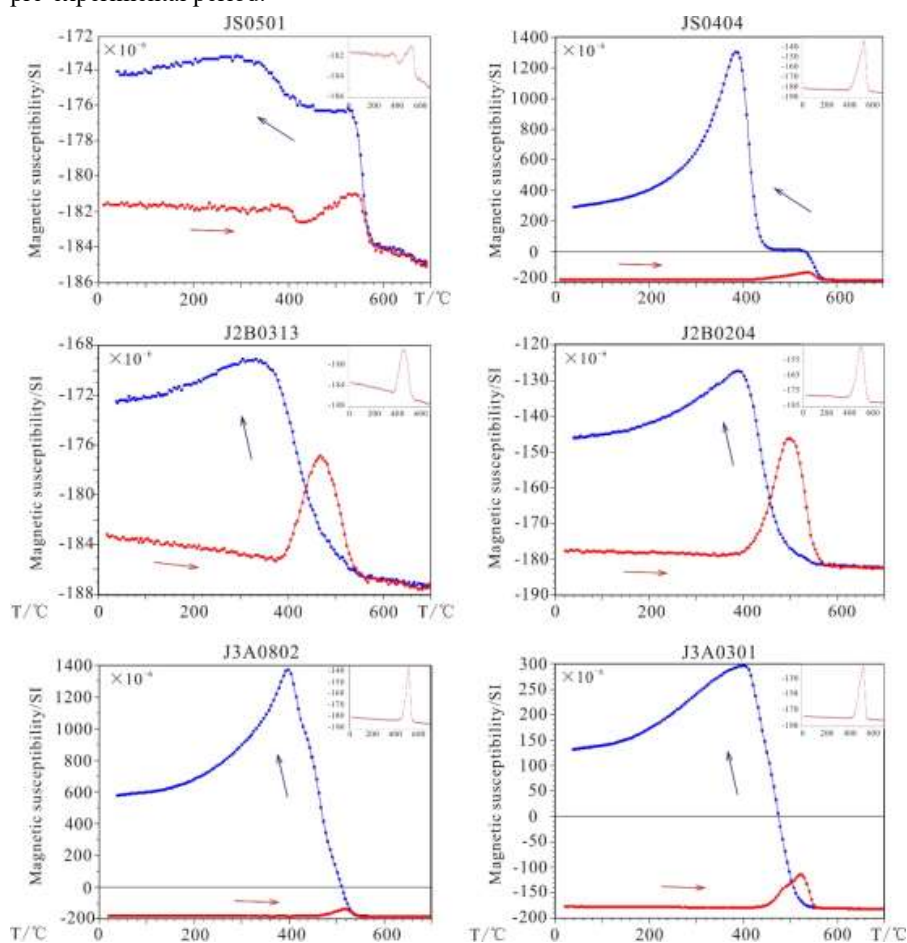

278  
 279 Figure 7. Variation of magnetization with temperature.  
 280

### 281 3.3.2 Saturated isothermal remanent magnetization experiment (SIRM)

282 The saturation isothermal remanent magnetization (SIRM) experiment uses the



283 saturation characteristic of magnetic minerals with increasing external fields to make a  
284 preliminary determination of the type of magnetic minerals in a sample. The curves for  
285 the Suowa samples show that the magnetization intensity increases rapidly with  
286 increasing external field at the beginning. When the external field strength is less than  
287 300 mT, the magnetization intensity gradually approaches saturation, indicating that the  
288 sample is dominated by magnetic minerals with low coercivity. The magnetization  
289 intensity of the samples from the Buqu and Shamuluo Formations has not reached  
290 saturation at 2T, indicating that the magnetically loaded minerals are all relatively  
291 homogenous and dominated by high coercivity magnetic minerals. The  
292 demagnetization curves in the reverse field also indicate low coercivity for the Suowa  
293 samples and high coercivity for the Buqu and Shamuluo samples (Figure 8).

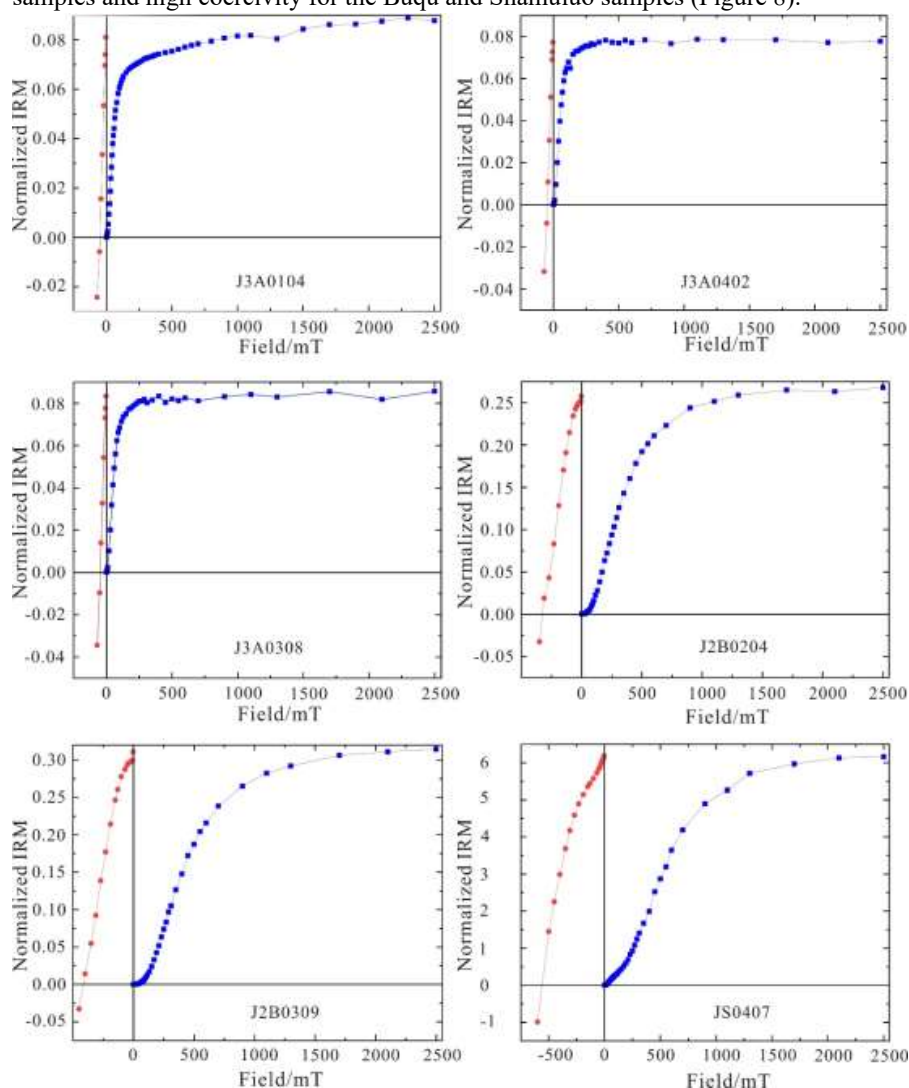

294  
295

Figure 8. Curves of saturated isothermal remanent magnetization variation.



296

### 297 **3.4 Magnetization and magnetic fabric characteristics**

#### 298 **3.4.1 Magnetic fabric scalar parameters**

299 Scalar parameters of magnetization anisotropy, including mean magnetization  
300 ( $K_m$ ), anisotropy ( $P_j$ ), shape factor ( $T$ ), maximum principal axis of magnetization  
301 ( $K_{max}$ ) and minimum principal axis of magnetization ( $K_{min}$ ), etc. Collectively, these  
302 scalars reflect magnetic fabric features (Table 1) and quantitatively characterize the  
303 degree of tectonic deformation (Tarling and Hrouda, 1993). The mean magnetization  
304 ( $K_m$ ) ranged from  $(-4.432-144) \times 10^{-6}$ SI, exhibiting a weak magnetization rate. The  
305 Shamuluo Formation is significantly higher than the Suowa and Buqu Formations, with  
306  $K_m$  between  $(119-144) \times 10^{-6}$ SI. The mean anisotropy ( $P_j$ ) of the samples ranged from  
307 0.996 to 1.282, with a relatively higher degree of strain in the Buqu Formation. Samples  
308 with strains in the Buqu and Suowa Formations have a high positive correlation  
309 between anisotropy ( $P_j$ ) and the mean magnetization ( $K_m$ ). In contrast, the anisotropy  
310 ( $P_j$ ) correlates weakly with the mean magnetization ( $K_m$ ) of the low-strain samples  
311 from the Suowa Formation and the undeformed samples from the Shamuluo Formation  
312 (Figure 9).

313 The shape factor ( $T$ ) of the magnetization ellipsoid reveals the deformation  
314 mechanism of the magnetization ellipsoid, with  $T > 0$  showing flattened ellipsoids and  
315  $T < 0$  showing elongated ellipsoids (Hrouda, 1982; Tarling and Hrouda, 1993). All  
316 samples from the Buqu Formation have  $T > 0$  and are dominated by “flattened”  
317 ellipsoids. The samples from Profile 1 of the Suowa Formation are dominated by  
318 “elongated” ellipsoids. The sample from Profile 2 is dominated by “flattened” ellipsoids.  
319 The Shamuluo Formation samples are generally ‘flattened’ ellipsoids. At the same time,  
320 the Flinn diagram uses the magnetic foliation ( $F$ ) and the magnetic lineation ( $L$ )  
321 parameters to distinguish the shape of the magnetization ellipsoid in terms of ellipticity  
322 ( $E$ ). The results are consistent with the ellipsoidal morphology of the magnetization  
323 reflected by the shape factor ( $T$ ) (Figure 9).

324 Pj-T diagrams provide a diagenetic analysis of the degree of deformation of rocks  
325 during tectonics (Jelinek, 1981; Hrouda, 1982). The magnetization ellipsoid moves  
326 from oblate to oblong to oblate, undergoing a process from sedimentary to tectonic  
327 (Borradaile and Henry, 1997). The transition of the ellipsoid from oblate to oblong,  
328 indicating the evolution of deformed sediments to palaeocurrent-disturbed or weakly  
329 deformed sediments. The evolution of oblong to oblate indicates the evolution of  
330 moderately deformed sediments to strongly deformed sediments (Wang et al, 2017).  
331 Samples from profiles 1 and 2 of the Buqu Formation, which exhibit a flattened  
332 ellipsoid, may be primary deposits or strongly deformed sediments. Samples from  
333 profile 3 of the Buqu Formation, with ellipsoids that are both oblate and oblong, may  
334 contain deformation processes ranging from primitive deposition to strong deformation,  
335 and possibly moderate to strong deformation. The samples from profile 1 of the Suowa  
336 Formation have predominantly oblate ellipsoids, suggesting moderate or strong tectonic  
337 deformation. The samples from profile 2 of the Suowa Formation has 60% of the  
338 ellipsoid as oblate and the other as oblong. It may be primitive deposition to



339 palaeocurrent or weak deformation processes, or moderate to strong deformation  
 340 processes. The ellipsoid of the Shamuluo Formation samples is oblate and may be  
 341 primitive deposition or a strong deformation process (Figure 9).

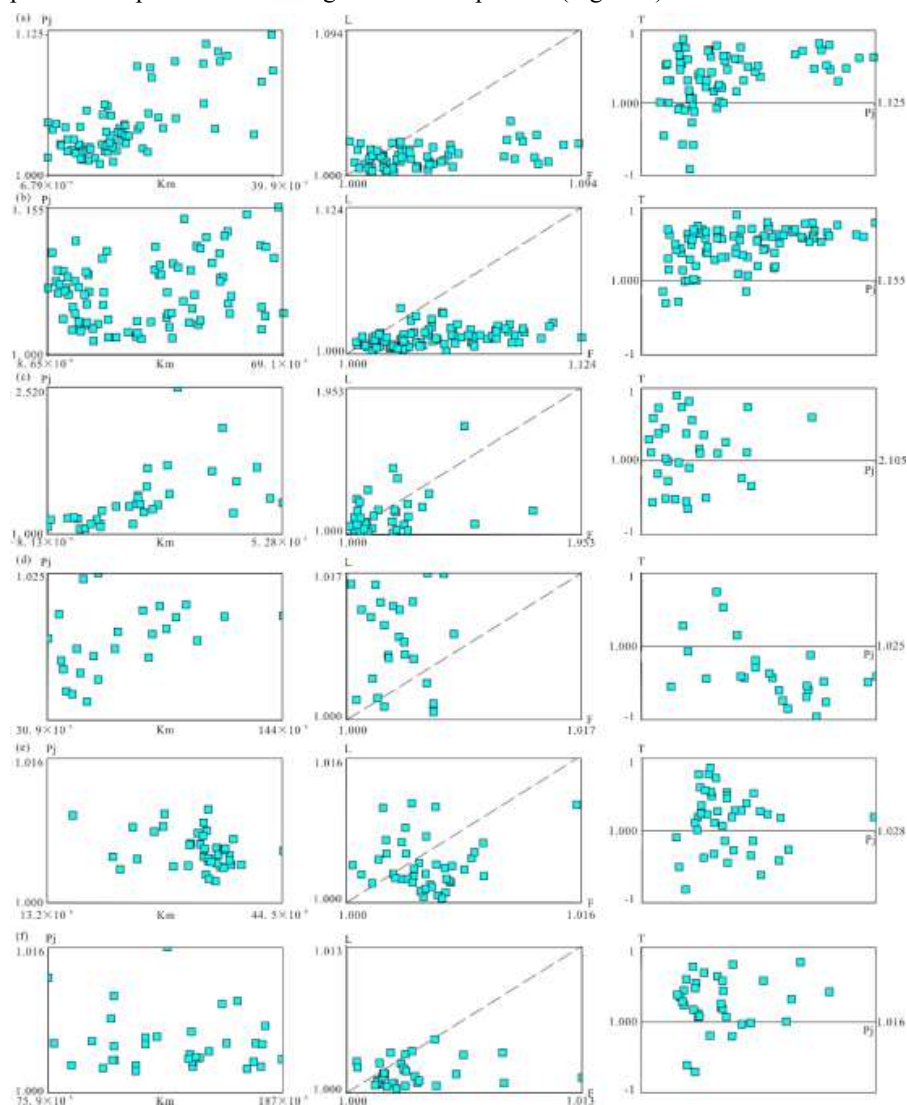

342 Figure 9. Diagram of magnetic fabric scalar parameter. (a) Profile 1 of Buqu Formation;  
 343 (b) Profile 2 of Buqu Formation; (c) Profile 3 of Buqu Formation; (d) Profile 1 of Suowa  
 344 Formation; (e) Profile 2 of Suowa Formation; (f) Profile of Shamuluo Formation.  
 345  
 346

### 347 3.4.2 Orientation of the main axis of the magnetization ellipsoid

348 Magnetization ellipsoids in deformed rocks correspond well to strain ellipsoids  
 349 (Wu, 1988; Tarling and Hrouda, 1993) and can reflect the dominant occurrence of the  
 350 rock.



351 1. Buqu Formation Profile

352 The equatorial projection of the main axis of magnetization of the Profile 1 shows  
353 that the magnetic lineation represented by the axis of maximum magnetization ( $K_{max}$ )  
354 is distributed in quadrants one, two and three and near the X axis, with a SW-NE  
355 direction of dominance and a dominant occurrence of  $27.7^\circ \angle 18.2^\circ$  with a relatively  
356 small inclination angle. The minimum magnetization principal axis ( $K_{min}$ ) is projected  
357 equatorially mainly in the second and fourth quadrants and near the Y-axis, with the  
358 dominant direction being near NW-SE, the dominant occurrence being  $143.2^\circ \angle 52.7^\circ$   
359 and the inclination angle being relatively large, reflecting the extrusion stress in the  
360 NW-SE direction. The equatorial projection of the main axis of magnetization of the  
361 Profile 2 shows that the magnetic lineation represented by the axis of maximum  
362 magnetization ( $K_{max}$ ) is distributed in quadrants three and four and near the X-axis,  
363 with a dominant direction of WE and a dominant occurrence of  $29.8^\circ \angle 42.7^\circ$ , with a  
364 relatively small inclination angle. The minimum magnetization principal axis ( $K_{min}$ )  
365 is projected equatorially in the second and fourth quadrants and near the Y-axis, with  
366 the dominant direction being NW-SE, the dominant occurrence of  $142.8^\circ \angle 23^\circ$  and a  
367 relatively large inclination angle, reflecting the extrusion stresses of NW-SE. The  
368 equatorial projection of the main axis of magnetization for the Profile 3 shows a  
369 scattered distribution of the axis of maximum magnetization ( $K_{max}$ ) with a dominant  
370 occurrence of  $122.4^\circ \angle 1.9^\circ$  and a relatively large inclination angle. The minimum  
371 magnetization principal axis ( $K_{min}$ ) is concentrated near the center of the circle,  
372 reflecting the magnetic fabric of the low deformation (Figure 10).

373 2. Suowa Formation Profile

374 The equatorial projection of the main axis of magnetization of the Profile 1 shows  
375 that the axis of maximum magnetization ( $K_{max}$ ) is projected near the center of the  
376 circle in the dominant NE-SW direction, with a dominant occurrence of  $88.9^\circ \angle 77.3^\circ$   
377 and a large inclination angle. The minimum magnetization principal axis ( $K_{min}$ ) is  
378 distributed in quadrants one, three and four, but reflect a dominant direction of  $184.6^\circ$   
379  $\angle 1.3^\circ$ , indicating extrusion stresses subject to NE-SW. The equatorial projection of  
380 the maximum axis of magnetization ( $K_{max}$ ) for the Profile 2 is in quadrants two and  
381 three, and shows a scattered distribution unlike the high strain samples. The minimum  
382 magnetization principal axis is concentrated near the center of the circle in the fourth  
383 quadrant, exhibiting a low degree of deformation in the magnetic fabric (Figure 10).

384 3. Shamuluo Formation Profile

385 The equatorial projection of the main axis of magnetization of the Shamuluo  
386 Formation samples shows that the axis of maximum magnetization ( $K_{max}$ ) is scattered  
387 in all quadrants and the axis of minimum magnetization ( $K_{min}$ ) is concentrated near  
388 the center of the circle, reflecting a low-deformation magnetic fabric. Compared to the  
389 low-deformation samples of the Suowa Formation, the minimum magnetization axis of  
390 the Shamuluo Formation is more concentrated in the center of the circle, and the  
391 maximum magnetization axis is more scattered and less strained (Figure 10)

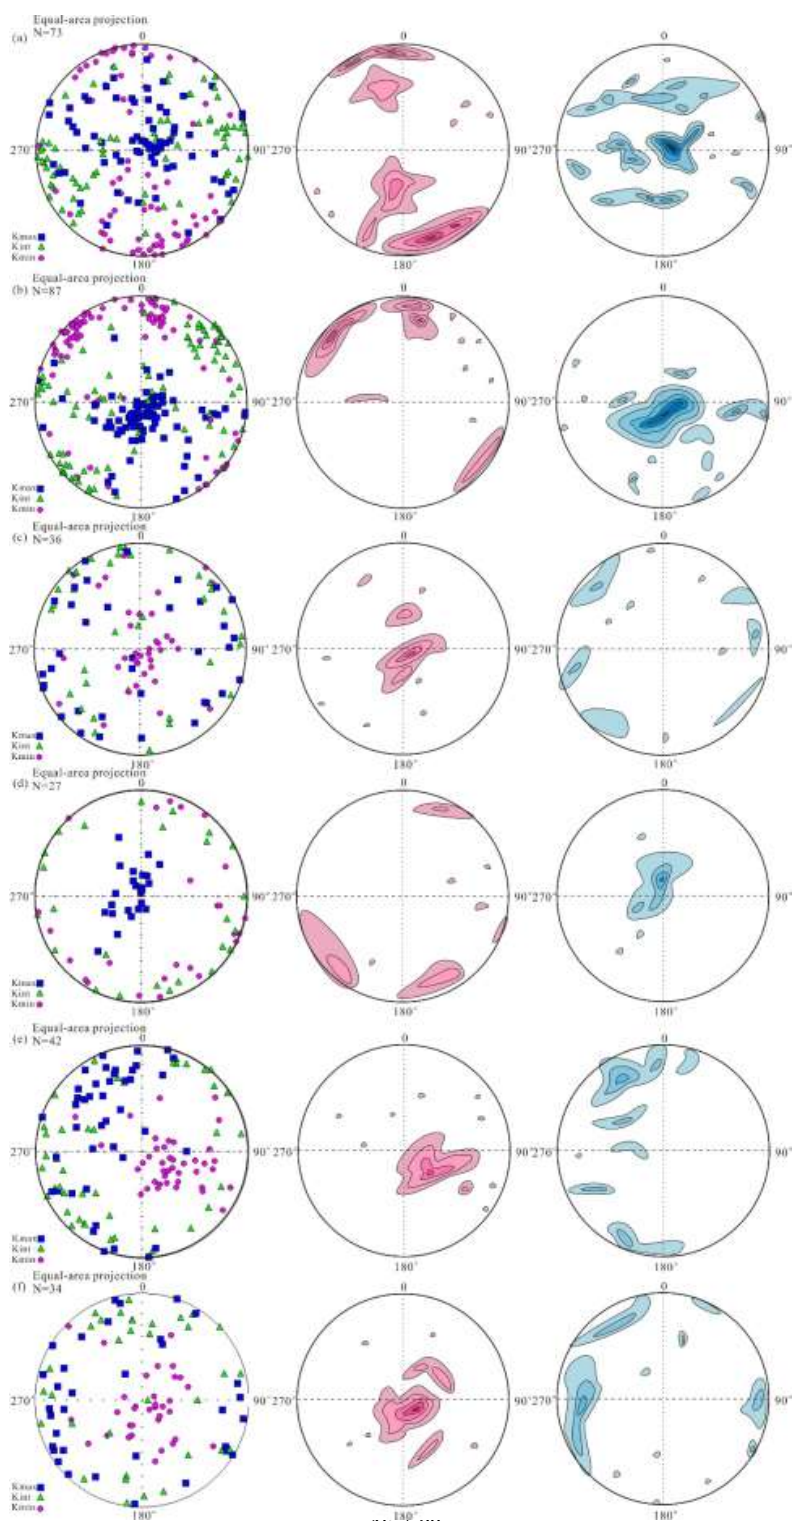



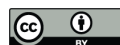

393 Fig. 10. Equatorial projection of the main axis of magnetization. (a) Profile 1 of Buqu  
394 Formation; (b) Profile 2 of Buqu Formation; (c) Profile 3 of Buqu Formation; (d) Profile  
395 1 of Suowa Formation; (e) Profile 2 of Suowa Formation; (f) Profile of Shamuluo  
396 Formation.

## 397 **4 Discussion**

### 398 **4.1 Stratigraphic time sequence of the Shamuluo Formation with the**

#### 399 **Buqu and Sowa Formations**

400 The Shamuluo Formation belonging to Late Jurassic-Early Cretaceous is exposed  
401 in the Ban-Nu Suture Zone and is representative of residual marine deposits. The Buqu  
402 and Suowa Formations belonging to Middle-Late Jurassic are exposed in the South  
403 Qiangtang Massif and represent the marine deposits of the Qiangtang Massif during the  
404 Jurassic. The division of the temporal sequence of the three strata is essential to  
405 constrain the sequence of tectonic events. The Shamuluo Formation is considered to  
406 belong to the Late Jurassic-Early Cretaceous by the biological fossils found in the Ban  
407 -Nu Suture Zone (Xie et al, 2009; Xie et al, 2010; Deng, et al, 2017). Previously  
408 obtained detrital zircon ages similarly indicate its formation in the Late Jurassic-Early  
409 Cretaceous (Huang et al, 2017; Wu et al, 2021). According to the detrital zircon dating  
410 study in this paper, the Shamuluo Formation in the central part of the suture zone is  
411 Early Cretaceous.

412 The temporal limit of the Buqu Formation is not much disputed and is generally  
413 considered to be Bathonian Stage, Middle Jurassic. Fossil and climatic studies of the  
414 lower part of the Suowa Formation suggest that it belongs to the Oxford Stage (163.5  
415 Ma-157.3 Ma), Late Jurassic (Zeng et al, 2021). Ammonites from the upper part suggest  
416 a Tithonian Stage, Late Jurassic (Song et al, 2016). It has also been suggested that the  
417 upper part of the Suowa Formation belongs to the Late Jurassic-Early Cretaceous (Fu  
418 et al, 2021; Zeng et al, 2021). For example, the  $151\pm 2$  Ma granodiorite dikes intruding  
419 the Shamuluo Formation (Ma et al, 2018) and the 143 Ma and 163 Ma Shamuluo  
420 Formation clastic rocks (Li et al, 2017) suggest a possible diachronism match with the  
421 Shamuluo Formation. However, based on the age of the Shamuluo Formation in this  
422 paper, it can be assumed that the Suowa Formation was deposited earlier than the  
423 Shamuluo Formation (Figure 11).

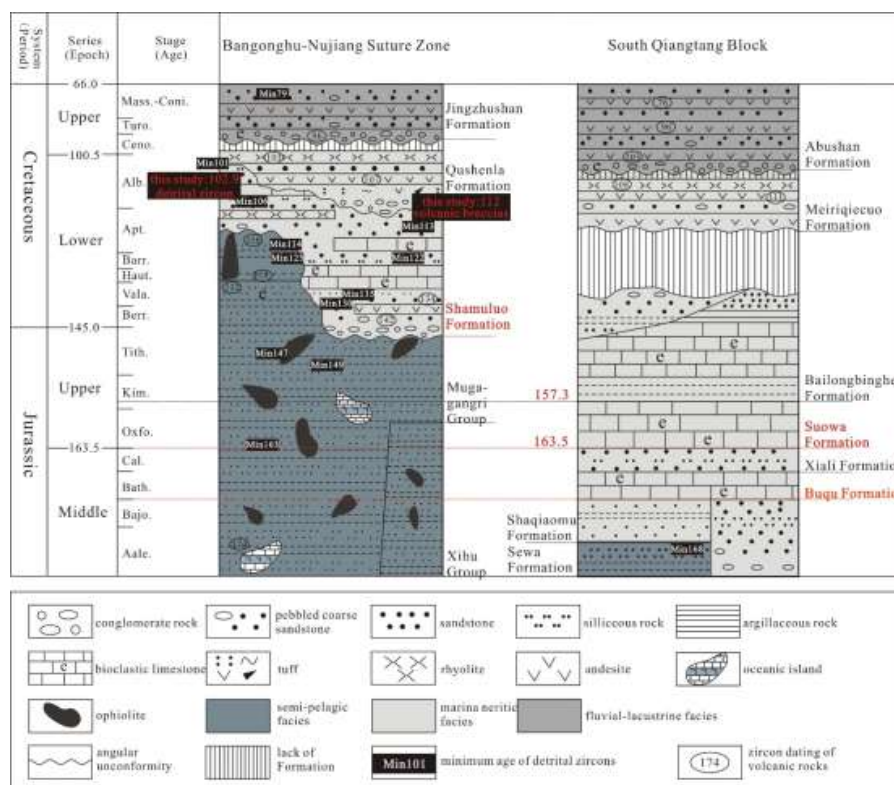

424

425 Fig. 11. Comparison of the stratigraphic sequence of the Shamuluo Formation with the  
 426 Buqu and Suowa Formations.

427

## 428 4.2 Influence of magnetically loaded minerals on magnetic fabric

### 429 parameters

430 The sandstones of the Shamuluo Formation have  $K_m$  values of  $(119-144) \times 10^{-6}SI$ ,  
 431 which are higher than those of the Suowa Formation. Rock magnetism experiments  
 432 indicate that the magnetically loaded minerals in both are dominated by magnetite and  
 433 paramagnetic minerals. Mineral microscopy shows more magnetite in the Shamuluo  
 434 Formation than in the Suowa Formation. Paramagnetic minerals, mainly including  
 435 white mica and chlorite, are also more abundant in the Shamuluo Formation. In addition,  
 436 diamagnetic minerals like quartz and feldspar are somewhat more abundant in the  
 437 Suowa Formation.  $K_m$  values for the Buqu Formation are relatively low, but negative  
 438 values are also present. Among the carbonate minerals, the main contributors to the  $K_m$   
 439 values should be the paramagnetic mineral and the diamagnetic mineral, such as calcite.  
 440 It is certain that the limestone sample with a negative  $K_m$  has calcite as the absolute  
 441 contributor and that this sample has a higher Fe content in the calcite, resulting in a  
 442 relatively large  $P_j$  (Schmidt et al, 2006). For most deformed rocks,  $P_j$  values generally



443 range from 1.05 to 2.5 (Pares, 2004). The sandstone samples of the Shamuluo  
444 Formation, with a mean  $P_j$  of 1.005, are undeformed rocks. All samples are Fe-bearing  
445 silicate minerals, with the exception of a limestone sample from profile 3 of the Buqu  
446 Formation, where  $P_j$  is greater than 1.35 (Jelinek, 1981).  $P_j$  is greater than 1.35 in the  
447 third profile of the Buqu Formation, suggesting a decisive influence of ferromagnetic  
448 minerals (Hrouda, 2010). For T values, silicate minerals are the main contributors to  
449 the AMS when  $0 \leq T \leq 1$  (Cao, 2022). All samples have T values  $> 0$  except for profile  
450 1 of the Suowa Formation, which has T values  $< 0$ , thus confirming the contribution of  
451 silicate minerals.

#### 452 **4.3 Magnetic fabric types and tectonic movements revealed**

453 Previous explorations of the evolution of sedimentary rock magnetic fabrics have  
454 suggested the existence of five strain fabrics following tectonic deformation of  
455 sedimentary rocks (Pares et al, 1999; Saint-Bezar et al, 2002; Luo et al, 2009). Based  
456 on the orientation of the main axis of the magnetic fabric, combined with the Flinn and  
457  $P_j$ -T diagrams, it is suggested that the samples from the Buqu Formation (profiles 1 and  
458 2) are all strongly cleaved magnetic fabric and that profile 3 is a transition from the  
459 original sedimentary fabric to the initial deformation fabric. The samples from the  
460 Suowa Formation (Profile 1) are of tensile lineation magnetic fabric, the samples from  
461 the Suowa Formation (Profile 2) are of initial deformation magnetic fabric, and the  
462 samples from the Shamuluo Formation are of primitive sedimentary magnetic fabric.  
463 The initial deformation magnetic fabric of the Suowa Formation (Profile 2) has a more  
464 concentrated  $K_{max}$  distribution and spreads along the strike of the formation,  
465 suggesting that it formed in an extrusive environment (Borradaile and Hamilton, 2004;  
466 Cifelli et al, 2005). The tensile lineation magnetic fabric of the Suowa Formation  
467 (Profile 1), with  $K_{max}$  perpendicular to the level and the direction of the magnetic  
468 fabric parallel to the direction of minimum principal stress, suggests that it formed in a  
469 tensile environment (Faccenna et al, 2002). In addition, the strongly cleaved magnetic  
470 fabric in profiles 1 and 2 of the Buqu Formation, which have the same magnetic  
471 lineation direction parallel to the direction of minimum principal stress, are formed in  
472 a tensile environment (Figure 10).

473 The magnetic fabric was closed early in the orogeny, and during general tectonic  
474 deformation, the magnetic fabric acquired early in the orogeny was rotated with the  
475 strata during later deformation (Larrasonana et al, 2004; Garaica-Lasanta et al, 2015),  
476 so the magnetic lineation should record the direction of the rotated palaeostress field  
477 (Scheepers and Langereis, 1994). The strongly cleaved magnetic fabric of the Buqu  
478 Formation, with its magnetic lineation directions of SW-NE and WE, respectively, may  
479 correspond to the direction of the paleostress field during rotation. In contrast, the  
480 tensile lineation magnetic fabric of the Suowa Formation, which has a SW-NE direction,  
481 also corresponds to the direction of the palaeostress field (Figure 10). This suggests that  
482 the Qiangtang Terrane may have undergone an anticlockwise rotation from WE to SW-  
483 NE orientation during the diagenetic phase from the Buqu Formation to the Suowa  
484 Formation.

#### 485 **4.4 Relationships between magnetic fabric and fracture movement**



486 Since the magnetization ellipsoid of strained rocks corresponds well to the strain  
487 ellipsoid (Borradaile, 1988; Wu, 1988), the axis of minimum magnetization ellipsoid  
488 ( $K_{min}$ ) represents the axis of compression of maximum strain, which is the direction  
489 of maximum extrusion stress (Tarling and Hrouda, 1993). Therefore, this dominant  
490 direction is defined as the extrusion stress vector  $R$ , which is decomposed into stress  
491 components  $N$  and  $P$  along its horizontal and vertical directions, and the relationship  
492 between the two is analyzed kinematically (Lu et al, 2008; Wang et al, 2017).

493 The two strongly cleaved magnetic fabric profiles of the Buqu Formation, where  
494 the fractures are located, are both WE trending and both have a minimum magnetization  
495 axis azimuth of about  $140^\circ$ . Therefore, a result is used instead of the vector  
496 decomposition of its main axis azimuth. Vector decomposition of the azimuth of the  
497 minimum magnetization principal axis in the horizontal plane along the fracture strike  
498 and vertical fracture strike (Figure 12). The results indicate that there is a sinistral  
499 movement of anticlockwise rotation in the horizontal plane along the strike of the  
500 fracture with a large component, indicating the presence of a relatively strong sinistral  
501 movement in the Buqu Formation. The same vectorial decomposition is performed for  
502 the tensile lineation magnetic fabric and the initial deformed magnetic fabric of the  
503 Suowa Formation (Figure 12). The results show that the same anticlockwise sinistral  
504 movement is present in the tensile lineation magnetic fabric, but its fraction is relatively  
505 reduced and the intensity of the possible sinistral slip is reduced. However, the initial  
506 deformed magnetic fabric samples exhibit a clockwise dextral movement with a  
507 relatively large component, indicating the presence of a relatively strong dextral  
508 movement.

509 For relatively continuous strata, there is a characteristic of levorotation and then  
510 dextrorotation, and the components change from strong to weak and then to strong.  
511 Combined with the anticlockwise rotation from WE to SW-NE that existed during the  
512 period from the Buqu Formation to the Suowa Formation as reflected by the  
513 palaeostress field. As well as the initial deformation magnetic fabric of the Suowa  
514 Formation, which occurred in the extrusion environment, and its tensile lineation  
515 magnetic fabric and the strongly cleaved magnetic fabric of the Buqu Formation  
516 occurred in the tension environment. Together, these three evidences suggest an  
517 extrusive tectonic setting from the Buqu Formation to the Suowa Formation as a result  
518 of the anticlockwise movement occurring in the South Qiangtang Massif. With this the  
519 anticlockwise movement stopped and the terrane began to rotate clockwise, producing  
520 a tensile tectonic environment accordingly. The upper part of the Suowa Formation may  
521 be the boundary between the two tectonic settings, and its origin is closely related to  
522 the subduction and closure of the BangongCo-Nujiang Tethys Ocean. It is possible that  
523 the subduction polarity of the Ban-Nu Tethys Ocean has changed, causing a change in  
524 the direction of plate rotation.

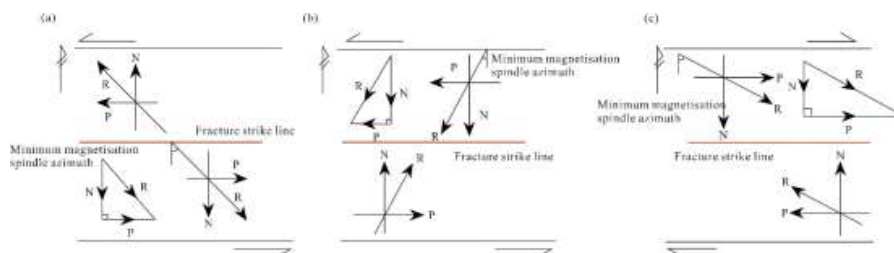

525

526 Figure 12. Analysis of magnetic fabric on fracture movement. (a) Profiles 1 and 2 of  
 527 Buqu Formation, strongly cleaved magnetic fabric; (b) Profile 1 of Suowa Formation,  
 528 tensile lineation magnetic fabric; (c) Profile 2 of Suowa Formation, initial deformed  
 529 magnetic fabric.

530

#### 531 4.5 Timing of closure and subduction polarity transition in the

#### 532 BangongCo-Nujiang Tethys Ocean

533 Studies on the time frame and mode of closure of the BangongCo-Nujiang Tethys  
 534 Ocean have mainly focused on the views of “diachronism closure” and “scissor  
 535 collision”, with closure times from east to west of  $116.6 \pm 0.8$  Ma,  $120 \pm 1.4$  Ma,  $107.8$   
 536  $\pm 8.1$  Ma, and  $96.0 \pm 1.1$  Ma, respectively (Fan et al, 2015; Wu et al, 2016). We believe  
 537 that at least in the middle of the suture zone, the Ban-Nu Ocean is closing and is in the  
 538 late stages of closure. The view comes from the following points, the source area  
 539 analysis suggests that the central and northern parts of the Lhasa Terrane, as well as the  
 540 South Qiangtang Massif, are potential sources for the Shamuluo Formation. The  
 541 exchange of material between the Lhasa Terrane, the Qiangtang Massif and the Suture  
 542 Zone marks the disappearance of the deep-sea shelf. Magnetic fabric studies indicate  
 543 that the sandstones of the Shamuluo Formation belong to a primitive sedimentary  
 544 magnetic fabric, marking a relatively stable depositional environment. Compared with  
 545 the deformed magnetic fabrics of the Buqu and Suowa Formations, this suggests that  
 546 strong tectonic events have been reduced. However, the 102.9 Ma age of the volcanic  
 547 rocks of the Shamuluo Formation again suggests that a tectonic thermal event still  
 548 existed at this time. In addition, a paleomagnetic comparison of the South Qiangtang  
 549 Massif (Cheng et al, 2012; Chen et al, 2017; Cao et al, 2018) and the Lhasa Terrane  
 550 (Zhou et al, 2016; Li et al, 2016, 2017; Ma et al, 2017; Cao et al, 2017; Bian et al, 2017)  
 551 for their Mesozoic paleolatitudinal positions (Figure 13), suggesting that the two  
 552 terranes began to collapse at 150 Ma and achieved collapse at 145 Ma, thus implying  
 553 the closure of the BangongCo-Nujiang Tethys Ocean. The synthesis suggests that the  
 554 closure of the BangongCo-Nujiang Tethys Ocean should be limited to after 109.9-131  
 555 Ma, when the degree of closure is nearing its end.

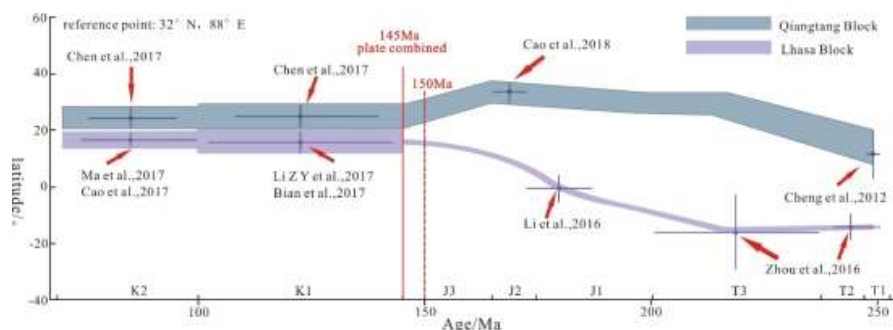

556

557 Figure 13. Paleolatitude changes and closure times since the Triassic in the Lhasa and  
 558 Qiangtang Terranes (Sun et al, 2019).

559

560

561 Changes in the polarity of oceanic subduction are caused by the upwelling of the  
 562 asthenosphere due to plate reversal to breakage (Gvirtzman and Nur, 1999; Tatsumi,  
 563 2006; Grove et al, 2009). There are various views on the subduction polarity of the  
 564 BangongCo-Nujiang Tethys Ocean. In the mainstream view of bidirectional subduction,  
 565 evidence includes the Biluocuo fore-arc basin in the South Qiangtang Massif (Ma et al,  
 566 2017), the Lalang ophiolite, and the formation of the Ban-Nu Suture Zone and the  
 567 Shiquan River-NamuCo-Bomi Suture Zone (Zhu et al, 2009, 2011, 2013; Sui et al,  
 2013).

568

569 Current research suggests that the Ban-Nu Ocean was subducted southward prior  
 570 to the late Suowa Formation of the South Qiangtang Massif (163.5-157.3 Ma).  
 571 Evidence to support this conclusion is that the period corresponds to the Oxfordian Age  
 572 when global sea level fell but the Qiangtang Basin was a regional sea level rise. The  
 573 cause of this event would be the southward subduction of the Ban-Nu Ocean, resulting  
 574 in a regional subsidence rate greater than the global rate of sea level fall, corresponding  
 575 to the extensional tectonic setting of the Qiangtang Massif. The extensional tectonic  
 576 setting of the strongly magnetic fabric of the Buqu Formation and the tensile lineation  
 577 magnetic fabric of the Suowa Formation may be responsible for the anticlockwise  
 578 rotation of the South Qiangtang Massif. The clockwise rotation of the terrane, as  
 579 revealed by the initial deformed magnetic fabric of the Suowa Formation, and the  
 580 creation of an extrusive tectonic setting, suggest that a change in subduction polarity  
 581 occurred in the Ban-Nu Ocean during the late Suowa Formation, when northward  
 582 subduction began. In addition, the detrital zircons of the Shamuluo Formation in this  
 583 paper reveal that the main body of the sample is in a collisional tectonic setting and a  
 584 few in a convergent tectonic setting, with the convergent setting occurring prior to the  
 585 collisional setting (Figure 14). This method reflects the different tectonic settings of the  
 586 sedimentary basins in which the detrital zircons are located by the difference between  
 587 the crystalline age of the detrital zircons and the age of the sedimentary strata (Cawood  
 588 et al, 2012). The convergent and collisional settings reflect an orogenic collisional event  
 589 between the Ban-Nu Suture Zone and the South Qiangtang Massif. This also suggests  
 590 that the Early Cretaceous, in which the Shamuluo Formation is located in this paper,  
 would have been the later stage of the merging of the BangongCo-Nujiang Tethys



591 Ocean with the South Qiangtang Massif.

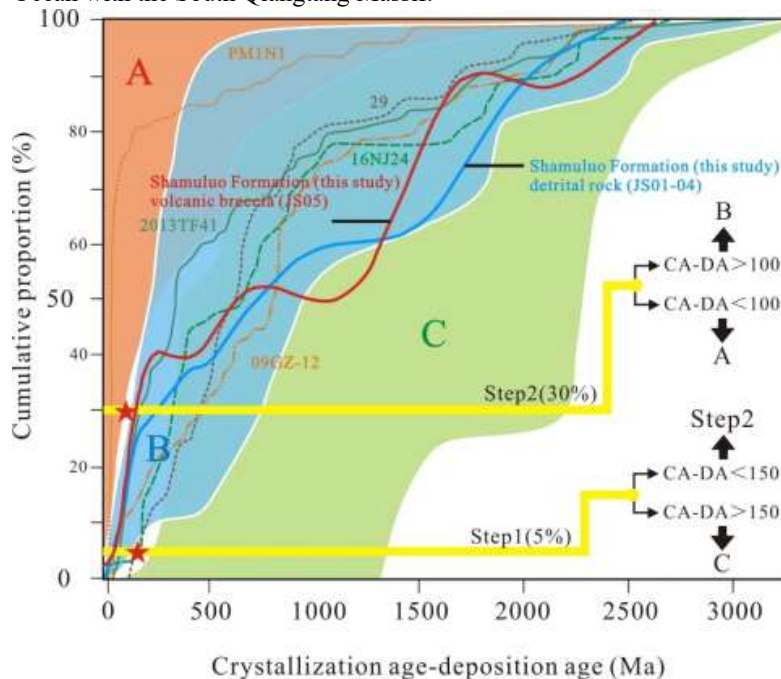

592  
593 Figure 14. Differences in zircon crystallization age and sedimentation age between  
594 different tectonic settings in the Shamuluo Formation.  
595

## 596 5 Conclusion

597 The following conclusions can be given, after carrying out the previous study of  
598 rock magnetism, magnetic fabric and zircon U-Pb chronology.

- 599 (1) Zircon U-Pb chronology of the Shamuluo formation exposed in the Ban-Nu Suture  
600 Zone indicates a weighted mean age of 102.9 Ma for the volcanic clastic rocks and  
601 a youngest age of 112-31 Ma for the sedimentary clastic rocks, belonging to the  
602 Late Jurassic-Early Cretaceous.
- 603 (2) In all samples, the magnetically loaded minerals were made up of magnetite,  
604 paramagnetic and diamagnetic minerals. The majority ingredient of the Shamuluo  
605 Formation is magnetite and paramagnetic minerals, and the remains is quartz and  
606 feldspar. The Suowa Formation is consistent with the Shamuluo Formation, but with  
607 less magnetite and more quartz and feldspar. The limestone of Buqu Formation is  
608 dominated by silicate minerals, some of which are with high iron content, leading  
609 to the high value of Pj.
- 610 (3) Among the strain magnetic fabrics of all samples, the strongly cleaved magnetic  
611 fabric of the Buqu Formation, the tensile lineation magnetic fabric of the Suowa  
612 Formation and the initial deformed magnetic fabric reveal anticlockwise sinistral  
613 and clockwise dextral movements, respectively. Thus, it indicates that the direction



614 of rotation of the South Qiangtang Massif changed from the Middle Jurassic to the  
615 Late Jurassic, possibly related to a change in the subduction polarity of the  
616 BangongCo-Nujiang Tethys Ocean. In addition, the Late Jurassic-Early Cretaceous  
617 Shamuluo Formation, which developed a primitive sedimentary magnetic fabric,  
618 may mark the imminent end of closure of the Ban-Nu Tethys Ocean.

619 (4) The BangongCo-Nujiang Tethys Ocean has been subducting southwards until the  
620 late Suowa Formation (163.5-157.3 Ma) and then changes its direction to  
621 northwards. Afterwards, it started to close at 145 Ma and stopped subduction at 131-  
622 109.9Ma.

## 623 **Competing interests**

624 The authors declare that they have no conflict of interest.

## 625 **Team list**

626 Hanning Wu (State Key Laboratory of Continental Dynamics, Department of Geology,  
627 Northwest University, 710069, China), Xin Cheng (State Key Laboratory of  
628 Continental Dynamics, Department of Geology, Northwest University, 710069, China),  
629 Feifei Huo (College of Engineering, Zunyi Normal University, Zunyi Guizhou 563006,  
630 China), Yannan Zhou (State Key Laboratory of Continental Dynamics, Department of  
631 Geology, Northwest University, 710069, China), Nan Jiang (College of Petrol and  
632 Environment Engineering, Yan'an University, Yan'an 716000, Shaanxi, China),  
633 Qinglong Chen ((State Key Laboratory of Continental Dynamics, Department of  
634 Geology, Northwest University, 710069, China), Bitian Wei (State Key Laboratory of  
635 Continental Dynamics, Department of Geology, Northwest University, 710069, China),  
636 Dongmeng Zhang (State Key Laboratory of Continental Dynamics, Department of  
637 Geology, Northwest University, 710069, China), Longyun Xing (State Key Laboratory  
638 of Continental Dynamics, Department of Geology, Northwest University, 710069,  
639 China), Teng Li (State Key Laboratory of Continental Dynamics, Department of  
640 Geology, Northwest University, 710069, China), Feifan Liu (State Key Laboratory of  
641 Continental Dynamics, Department of Geology, Northwest University, 710069, China),  
642 Xiaohong Deng (State Key Laboratory of Continental Dynamics, Department of  
643 Geology, Northwest University, 710069, China), Shuqi Lan (State Key Laboratory of  
644 Continental Dynamics, Department of Geology, Northwest University, 710069, China),  
645 Jingyue Wu (State Key Laboratory of Continental Dynamics, Department of Geology,  
646 Northwest University, 710069, China), Jiawei Wang (State Key Laboratory of  
647 Continental Dynamics, Department of Geology, Northwest University, 710069, China),  
648 Baofeng Wang (Gansu Provincial Coal Geological Exploration Institute, Lanzhou  
649 730000, China), Pengxiang Xu (Gansu Provincial Coal Geological Exploration  
650 Institute, Lanzhou 730000, China).





## 651 **Author Contributions**

652 Qinglong Chen proposed the study; sampled in the field; analyzed the data; designed  
653 the figures; collected the data and evidence; and wrote the initial draft. Hanning Wu  
654 provided funding support; supervised the execution; and managed the research planning.  
655 Xin Cheng managed the data. Feifei Huo analyzed the study data. Yanan Zhou  
656 conducted the research process. Nan Jiang designed the methodology. Bitian Wei  
657 sampled in the field; and tested the software. Baofeng Wang sampled in the field.  
658 Pengxiang Xu sampled in the field. Dongmeng Zhang sampled in the field; tested the  
659 software. Longyun Xing sampled in the field. Teng Li sampled in the field. Feifan Liu  
660 sampled in the field. Jingyue Wu sampled in the field. Jiawei Wang sampled in the field.



661 **References**

- 662 Ao, H., and Deng, C.L.: Review in the identification of magnetic minerals, PROGRESS  
663 IN GEOPHYSICS., 22, 432-442, <https://doi.10.3969/j.ssn.1004-2903.2007.02.015>,  
664 2007.
- 665 Bian, W., Yang, T., Ma, Y., et al.: New early Cretaceous paleomagnetic and  
666 geochronological results from the far western Lhasa terrane: Contributions to the  
667 Lhasa-Qiangtang collision, Sci. rep-uk., 7, 16216, <https://doi.org/10.1038/s41598-017-16482-3>, 2017.
- 668
- 669 Borradaile, G. J.: Magnetic susceptibility, petrofabrics and strain, Tectonophysics., 156,  
670 1-20, [https://doi.org/10.1016/0040-1951\(88\)90279-X](https://doi.org/10.1016/0040-1951(88)90279-X), 1988.
- 671 Borradaile, G. J., and Henry, B.: Tectonic applications of magnetic susceptibility and  
672 its anisotropy, Earth-sci. rev., 42, 49-93, [https://doi.10.1016/S0012-8252\(96\)00044-X](https://doi.10.1016/S0012-8252(96)00044-X), 1997.
- 673
- 674 Borradaile, G. J., and Hamilton, T.: Magnetic fabrics may proxy as neotectonic stress  
675 trajectories, Polis rift, Cyprus, Tectonics., 23, TC1001,  
676 <https://doi.org/10.1029/2002TC001434>, 2004.
- 677 Cao, X. W., Sun, Z. M., Huang, B. C., et al.: Magnetic fabric separation and analysis of  
678 rock tectonic deformation, Chinese J. Geophys., 65, 448-470,  
679 <https://doi.10.6038/cjg2022P0336>, 2022.
- 680 Cao, Y., Sun, Z. M., Li, H. B., et al.: New Late Cretaceous paleomagnetic data from  
681 volcanic rocks and red beds from the Lhasa terrane and its implications for the  
682 paleolatitude of the southern margin of Asia prior to the collision with India,  
683 Gondwana res., 41, 337-351, <https://doi.org/10.1016/j.gr.2005.11.006>, 2017.
- 684 Cao, Y., Sun, Z. M., Li, H. B., et al.: New paleomagnetic results from Middle Jurassic  
685 limestones of the Qiangtang terrane, Tibet: Constraints on the evolution of the  
686 Bangong-Nujiang Ocean, Teconics., 38, 215-232,  
687 <https://doi.org/10.1029/2017TC004842>, 2018.
- 688 Chen, W., Zhang, S., Ding, J., et al.: Combined paleomagnetic and geochronology study  
689 on Cretaceous strata of the Qiangtang terrane, central Tibet, Gondwana res., 41,  
690 93-109, <https://doi.org/10.1016/j.gr.2015.07.004>, 2017.
- 691 Cheng, X., Wu, H. N., Diao, B. G., and et al.: New paleomagnetic result of the Middle-  
692 Late Jurassic rocks from the northern Qiangtang Block, west China, Chinese J.  
693 Geophys., 55, 3399-3409, <https://doi.10.6038/j.ossn.0001-5733.2012.10.023>,  
694 2012.
- 695 Cifelli, F., Mattei, M., Chadima, M., Hirt, A. M., and Hansen, A.: The origin of tectonic  
696 lineation extensional basins: Combined neutron texture and magnetic analyses on  
697 “undeformed” clays, Earth planet sc lett., 235, 62-78,  
698 <https://doi.org/10.1016/j.epsl.2005.02.042>, 2005.
- 699 Deng, J. H., Yuan, Z. G., Yu, Jiang., Du, C. F., et al.: New discovery of the Basal  
700 Conglomerate in the Upper Jurassic-Lower Cretaceous Shamuluo Formation in  
701 Western part of Bangong Lake-Nujiang River Suture Zone and its geological  
702 significance, Geol. Rev., 63, 302-310, 2017.
- 703 Fan, J. J., Li, C., Xie, C. M., et al.: The Evolution of the Bangong-Nujiang Neo-Tethys

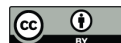

- 704 Ocean: Evidence from Zircon U-Pb and Lu-Hf Isotopic Analyses of Early  
705 Cretaceous Oceanic Islands and Ophiolites, *Tectonophysics.*, 655, 27-40,  
706 <https://doi.org/10.1016/j.tecto.2015.04.019>, 2015.
- 707 Faccenna, C., Speranza, F., Caracciolo, F.D., Mattei, M. and Oggiano, G.: Extensional  
708 tectonics on Sardinia (Italy): insights into the arc-back-arc transitional regime,  
709 *Tectonophysics.*, 365, 213-232, [https://doi.org/10.1016/S0040-1951\(02\)00287-1](https://doi.org/10.1016/S0040-1951(02)00287-1),  
710 2002.
- 711 Fu, X. G., Wang, J., Wen, H. G., Song, C. Y., Wang, Z. W., Zeng, S. Q., Feng, X. L.,  
712 Wei, H. Y.: A Toarcian Ocean Anoxic Event record from an open-ocean setting in  
713 the eastern Tethys: Implications for global climatic change and regional  
714 environmental perturbation, *Sci china earth sci.*, 64, 1860-1872,  
715 <https://doi.org/10.1007/s11430-020-9753-1>, 2021.
- 716 Garcia-Lasanta, C., Oliva-Urcia, B., Roman-Berdiel, T., et al.: Evidence for the Permo-  
717 Triassic transtensional rifting in the Iberian Range (NE Spain) according to  
718 magnetic fabrics results, *Tectonophysics.*, 651-652, 216-231,  
719 <https://doi.org/10.1016/j.tecto.2015.03.023>, 2015.
- 720 Grove, T. L., Till, C. B., Lev, E., et al.: Kinematic variables and water transport control  
721 the formation and location of arc volcanoes, *Nature*, 459, 694-697,  
722 <https://doi.org/10.1038/nature08044>, 2009.
- 723 Gurioli, L., Pareschi, M. T., Zanella, E., et al.: Interaction pyroclastic density currents  
724 with human settlements: Evidence from ancient Pompeii, *Geology.*, 33, 441-444,  
725 <https://doi.org/10.1130/g21294.1>, 2005
- 726 Gvirtzman, Z., and Nur, A.: The formation of Mount Etna as the consequence of slab  
727 rollback, *Nature.*, 401, 782-785, <https://doi.org/10.1038/44555>, 1999.
- 728 Gynn, J., Kapp, P., Pullen, A., Heizler, M., Gehrels, G., and Ding L.: Tibetan basement  
729 rocks near Amdo reveal “missing” Mesozoic tectonism along the Bangong suture,  
730 central Tibet, *Geology.*, 34, 505-508, <https://doi.org/10.1130/G22453.1>, 2006.
- 731 Hermann, J., Rubatto, D., Korsakov, A., et al.: Multiple Zircon Growth During Fast  
732 Exhumation of Diamondiferous, Deeply Subducted Continental Crust (Kokchetav  
733 Massif, Kazakhstan), *Contrib mineral petr.*, 141, 66-82,  
734 <https://doi.org/10.1007/s004100000218>, 2001.
- 735 Hrouda, F.: Magnetic anisotropy of rocks and its application in geology and  
736 geophysics, *Geophysical Surveys.*, 5, 37-82, <https://doi.org/10.1007/BF01450244>,  
737 1982.
- 738 Hrouda, F.: A technique for the measurement of thermal changes of magnetic  
739 susceptibility of weakly magnetic rocks by the CS-2 apparatus and KLY-2  
740 Kappabridge, *Geophys j int.*, 118, 604-612, [https://doi.org/10.1111/j.1365-  
741 246X.1994.tb03987.x](https://doi.org/10.1111/j.1365-246X.1994.tb03987.x), 1994.
- 742 Hrouda, F.: Modelling relationship between bulk susceptibility and AMS in rocks  
743 consisting of two magnetic fractions represented by ferromagnetic and  
744 paramagnetic minerals-Implications for understanding magnetic fabrics in  
745 deformed rocks, *J geol soc india.*, 75, 254-266, [https://doi.org/10.1007/s12594-010-  
746 0013-0](https://doi.org/10.1007/s12594-010-0013-0), 2010.
- 747 Hu, P. Y., Zhai, Q. C., Jahn, B. M., Wang, J., Li, C., et al.: Late Early Cretaceous

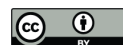

- 748 magmatic rocks(118-113Ma) in the middle segment of the Bangong-Nujiang  
749 suture zone, Tibetan Plateau: Evidence of lithospheric delamination, *Gondwana*  
750 *res.*, 44, 116-138, <https://doi.org/10.1016/j.gr.2016.12.005>, 2017.
- 751 Huang, T. T., Xu, J. F., Chen, J. L., et al.: Sedimentary record of Jurassic Northward  
752 subduction of the Bangong-Nujiang Ocean: Insights from detrital zircons, *Int geol*  
753 *rev.*, 59, 166-184, <https://doi.org/10.1080/00206814.2016.1218801>, 2017.
- 754 Ishizuka, O., Tani, K., Reagan, M. K., et al.: Izu-Bonia-Mariana Forearc Crust as a  
755 Modern Ophiolite Analogue, *Elements.*, 10, 115-120, 2014.
- 756 Jelinek, V.: Characterization of the magnetic fabric of rocks, *Tectonophysics.*, 79, T63-  
757 T67, [https://doi.org/10.1016/0040-1951\(81\)90110-4](https://doi.org/10.1016/0040-1951(81)90110-4), 1981.
- 758 Kapp, P., Decelles, P. G., Gehrels, G. E., Heizler, M., and Ding L.: Geological records  
759 of the Lhasa-Qiangtang and Indo-Asian collisions in the Nima area of Central  
760 Tibet, *Geological Society on America Bulletin.*, 119, 917-933,  
761 <https://doi.org/10.1130/B26033.1>, 2007.
- 762 Kneen, S.: The relationship between the magnetic and strain fabrics of some haematite-  
763 bearing Welsh slates, *Earth planet sci lett.*, 31, 413-416,  
764 [https://doi.org/10.1016/0012-821X\(76\)90123-0](https://doi.org/10.1016/0012-821X(76)90123-0), 1976.
- 765 Larrasoana, J. C., Pueyo, E. L., and Pares, J. M.: An integrated AMS, structural, palaeo-  
766 and rock-magnetic study of Eocene marine marls from the Jaca-Pamplona basin  
767 (Pyrenees, N Spain): new insights into the timing of magnetic fabric acquisition in  
768 weakly deformed mudrocks. *Geological Society, London, Special Publications.*, 238,  
769 127-144, <https://doi.org/10.1144/GSL.SP.2004.238.01.10>, 2004.
- 770 Li, F. Q., Tang, J. X., Zhang, J., Song, Y., Li, H. F., Lin, B. and Wang, N.: Discovery of  
771 Late Early Cretaceous diorite porphyrite from the Shamuluo Formation in the  
772 Gaize area, Tibet: Response to the northward subduction plate rollback event of  
773 Bangongco-Nujiang Tethys Ocean, *Acta Petrological Sinica.*, 38, 185-208,  
774 <https://doi.org/10.18654/1000-0569/2022.01.13>, 2022.
- 775 Li, S., Ding, L., Guilmette, C., et al.: The Subduction-Accretion History of the  
776 Bangong-Nujiang Ocean: Constraints from Provenance and Geochronology of the  
777 Mesozoic Strata near Gaize, Central Tibet, *Tectonophysics.*, 702, 42-60,  
778 <https://doi.org/10.1016/j.tecto.2017.02.023>, 2017.
- 779 Li, Z. Y., Ding, L., Lippert, P. C., et al.: Paleomagnetic constraints on the Mesozoic drift  
780 of the Lhasa terrane (Tibet) from Gondwana to Eurasia, *Geology.*, 44, 727-730,  
781 <https://doi.org/10.1130/G38030.1>, 2016.
- 782 Li, Z. Y., Ding, L., Song, P. P., et al.: Paleomagnetic constraints on the paleolatitude of  
783 the Lhasa block during the Early Cretaceous: Implications for the onset of India-  
784 Asia collision and latitudinal shortening estimates across Tibet and stable Asia,  
785 *Gondwana res.*, 41, 352-372, <https://doi.org/10.1016/j.gr.2015.05.013>, 2017.
- 786 Liu, D.L., Huang, Q. S., Fan, S. Q., Zhang, L. Y., et al.: Subduction of the Bangong-  
787 Nujiang Ocean: constraints from granites in the Bangong Co area, Tibet, *Geol j.*,  
788 49, 188-206, <https://doi.org/10.1002/gj.2510>, 2014.
- 789 Liu, Y. S., Hu, Z. C., Zong, K. Q., et al.: Reappraisal and Refinement of Zircon U-  
790 Pb Isotope and Trace Element Analyses by LA-ICP-MS, *Chin sci b-chin.*, 55,  
791 1535-1546, <https://doi.org/10.1007/s11434-010-3052-4>, 2010.

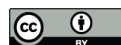

- 792 Lu, R. K., Zhang, G. W., Zhong, H. M., et al.: Characteristics of magnetic fabrics in  
793 western segment of the Altun fault belt and its tectonic significance, *Chinese J.*  
794 *Geophys.*, 51, 752-761, <https://doi.org/10.1002/cjg2.1244>, 2008.
- 795 Luo, L., Jia, D., Li, H. B., et al.: Magnetic fabric investigation in the northwestern  
796 Sichuan Basin and its regional inference, *Phys earth planet in.*, 173, 103-114,  
797 <https://doi.org/10.1016/j.pepi.2008.11.004>, 2009.
- 798 Ma, A. L., Hu, X. M., Kapp, P., et al.: The disappearance of the Late Jurassic Remnant  
799 Sea in the Southern Qiangtang Block (Shamuluo Formation, Najiango Area):  
800 Implications for the Tectonic Uplift of Central Tibet, *Palaeogeogr palaeocl.*, 506,  
801 30-47, <https://doi.org/10.1016/j.palaeo.2018.06.005>, 2018.
- 802 Ma, Y., Yang, T., Bian, W., et al.: Paleomagnetic and geochronology results of latest  
803 Cretaceous lava flows from the Lhasa Terrane and their tectonic implications, *J*  
804 *geophys res-sol ea.*, 122, 8786-8809, <https://doi.org/10.1002/2107JB014743>, 2017.
- 805 Metcalfe, I.: Gondwana dispersion and Asian accretion: Tectonic and palaeogeographic  
806 evolution of eastern Tethys, *J Asian earth sci.*, 66, 1-33,  
807 <https://doi.org/10.1016/j.jseaes.2012.12.020>, 2013.
- 808 Pan, G. T., Wang, L. Q., Li, R. S., et al.: Tectonic evolution of the Qinghai-Tibet Plateau,  
809 *J Asian earth sci.*, 53, 3-14, <https://doi.org/10.1016/j.jseaes.2011.12.018>, 2012.
- 810 Pares, J. M., van der Pluijm, B. A., Dinares-Turell, J.: Evolution of magnetic fabrics  
811 during incipient deformation of mudrocks (Pyrenees, northern Spain),  
812 *Tectonophysics.*, 307, 1-14, [https://doi.org/10.1016/S0040-1951\(99\)00115-8](https://doi.org/10.1016/S0040-1951(99)00115-8), 1999.
- 813 Pares, J. M.: How deformed are weakly deformed mudrocks? Insights from magnetic  
814 anisotropy, *Geological Society, London, Special Publications.*, 238, 191-203,  
815 <https://doi.org/10.1144/gsl.sp.2004.238.01.13>, 2004.
- 816 Rathore, J. S.: Application of magnetic susceptibility anisotropy technique to the study  
817 of geological structures in the Armorican massif, France, *Tectonophysics.*, 60,  
818 207-216, [https://doi.org/10.1016/0040-1951\(79\)90159-8](https://doi.org/10.1016/0040-1951(79)90159-8), 1979.
- 819 Saint-Bezar, B., Herbert, R. L., Aubourg, C., et al.: Magnetic fabric and petrographic  
820 investigation of hematite-bearing sandstones within ram-related folds: examples  
821 from the South Atlas Front (Morocco), *J struct geol.*, 24, 1507-1520, [https://doi.org/10.1016/S0191-8141\(01\)00140-7](https://doi.org/10.1016/S0191-8141(01)00140-7), 2002.
- 822 Scheepers, P. J. J., and Langereis, C. G.: Magnetic fabric of Pleistocene clays from the  
823 Tyrrhenian arc: A magnetic lineation induced in the final stage of the middle  
824 Pleistocene compressive event, *Tectonics.*, 13, 1190-1200,  
825 <https://doi.org/10.1029/94TC00221>, 1994.
- 826 Schmidt, V., Gunther, D., and Hirt, A. M.: Magnetic anisotropy of calcite at room-  
827 temperature, *Tectonophysics.*, 418, 63-73, <https://doi.org/10.1016/j.tecto.2005.12.019>,  
828 2006.
- 829 Song, C. H., Zeng, Y. Y., Yan, M. D., Wu, S., et al.: Magnetostratigraphy of the middle-  
830 upper Jurassic sedimentary sequences at Yanshiping, Qiangtang Basin, China,  
831 *Geophys j int.*, 206, 1847-1863, <https://doi.org/10.1093/gji/ggw199>, 2016.
- 832 Tarling, D., and Hrouda, F.: *The magnetic anisotropy of rocks*, London: Chapman and  
833 Hall., 1-189, 1993.
- 834 Wang, B. D., Wang, L. Q., Chung, S. L., et al.: Evolution of the Bangong-Nujiang  
835

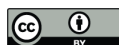

- 836 Tethyan ocean: insights from the geochronology and geochemistry of mafic rocks  
837 within ophiolites, *Lithos.*, 245, 18-33, <https://doi.org/10.1016/j.lithos.2015.07.016>,  
838 2016.
- 839 Wang, K., Jia, D., Luo, L., et al.: Magnetica fabric and structural deformation, *Chines*  
840 *J. Geophys.*, 60, 1007-1026, <https://doi.10.6038/cjg20170315>, 2017.
- 841 Whattam, S. A., and Stern, R. J.: The “subduction initiation rule”: a key for linking  
842 ophiolites, intra-oceanic forearcs, and subduction initiation, *Contrib mineral petr.*,  
843 162, 1031-1045, <https://doi.org/10.1007/s00410-011-0638-z>, 2011.
- 844 Wu, H., Li, C., Xu, M. J., et al.: Early Cretaceous Adakitic Magmatism in the Dachagou  
845 Area, Northern Lhasa Terrane, Tibet: Implications for Slab Roll-Back and  
846 Subsequent Slab Break-off of the Lithosphere of the Bangong-Nujiang Ocean, *J*  
847 *asian earth sci.*, 97, 51-66, <https://doi.org/10.1016/j.jseaes.2014.10.014>, 2015.
- 848 Wu, H. N.: Magnetic fabric of rock and its application in analysis of rock deformation,  
849 *Acta Petrol. Sin.*, 52, 2588-2594, 1988.
- 850 Wu, J. L., Liu, W., Yin, X. K., Lei, C. Y., and Wang, B.: Geochronology, Zircon Hf  
851 Isotope and Geochemistry of volcanic Rocks from Shamuluo Formation in  
852 Western Bangongco-Nujiang Suture Zone, North Tibet, *Earth-sci rev.*, 46, 444-459,  
853 <https://doi.org/10.3799/dqkx.2020.104>, 2021.
- 854 Xie, G. G., Mo, X. X., Zhao, Z. D., et al.: Jurassic-Cretaceous sedimentation and  
855 evolution of ancient oceanic basic in Bangong Lake area, Tibet, *Earth Science*  
856 *Frontiers.*, 16, 031-039, 2009.
- 857 Xu, Y. J., Du, Y. S., Cawood, P. A., et al.: Detrital Zircon Record of Continental collision:  
858 Assembly of the Qilian Orogen, China, *Sediment geol.*, 230, 35-45,  
859 <https://doi.org/10.1016/j.sedgeo.2010.06.020>, 2010.
- 860 Yin, A., and Harrison, T. M.: Geological evolution of the Himalayan-Tibetan Orogen,  
861 *Annu rev earth pl sc.*, 28, 211-280, 2000.
- 862 Zeng, S. Q., Wang, J., Zeng, Y. H., et al.: Episodic volcanic eruption and arid climate  
863 during the Triassic-Jurassic transition in the Qiangtang Basin, eastern Tethys: A  
864 possible linkage with the end-Triassic biotic crises, *J asian earth sci.*, 237,  
865 <https://doi.org/10.1016/j.jseaes.2022.105345>, 2022.
- 866 Zeng, Y. Y., Gao, L., and Zhao, W. Q.: Paleoclimate evolution and aridification  
867 mechanism of the eastern Tethys during the Callovian-Oxfordian: evidence from  
868 geochemical records of the Qiangtang Basin, Tibetan Plateau, *Acta Geochimica.*,  
869 40, 199-211, <https://doi.org/10.1007/s11631-021-00458-2>, 2021.
- 870 Zhu, D. C., Zhao, Z. D., Niu, Y. L., et al.: The Lhasa Terrane: record of a microcontinent  
871 and its histories of drift and growth, *Earth planet sc lett.*, 301, 241-255,  
872 <https://doi.org/10.1016/j.epsl.2010.11.005>, 2011.
- 873 Zhu, D. C., Li, S. M., Cawood, P. A., Wang, Q., Zhao, Z. D., Liu, S. A., and Wang, L.  
874 Q.: Assembly of the Lhasa and Qiangtang terranes in central Tibet by divergent  
875 double subduction, *Lithos.*, 245, 7-17,  
876 <https://doi.org/10.1016/j.lithos.2015.06.023>, 2016.
- 877 Zhou, Y. N., Cheng, X., Yu, L., et al.: Paleomagnetic study on the Triassic rocks from  
878 the Lhasa Terrane, Tibet, and its paleogeographic implications, *J asian earth sci.*,  
879 121, 108-119, <https://doi.org/10.1016/j.jseaes.2016.02.006>, 2016.
